# Supplementary material for: Retinoic Acid Metabolism-Related Enzyme Signature Identified Prognostic and Immune Characteristics in Sarcoma
Source: Front Cell Dev Biol. 2022 Feb 3;9:780951. doi: 10.3389/fcell.2021.780951 (PMC8852678; doi:10.3389/fcell.2021.780951)
Supplement: Supplementary file 12 [file Table4.xlsx]

## Sheet: Sheet1
Table S4. GSEA enrichment results based on KEGG and hallmark gene sets.
	ID	Description	setSize	enrichmentScore	NES	pvalue	p.adjust	qvalues	rank	leading_edge	core_enrichment
HALLMARK_E2F_TARGETS	HALLMARK_E2F_TARGETS	HALLMARK_E2F_TARGETS	195	-0.561383	-2.23405	0.00175131	0.00733568	0.00386088	10502	tags=78%, list=36%, signal=50%	ZW10/MCM5/ASF1B/GSPT1/EIF2S1/BRCA1/PAN2/RPA1/HUS1/PRPS1/CIT/NUDT21/DCTPP1/PMS2/CSE1L/TRA2B/NOLC1/CENPM/KPNA2/BRCA2/DDX39A/EXOSC8/SRSF1/UBR7/PSMC3IP/TK1/AK2/RFC1/CKS1B/HMMR/RAN/SMC6/PRIM2/SPC24/POLD2/SMC1A/RAD21/GINS3/SMC3/POLD3/SSRP1/NOP56/CBX5/TMPO/CDC25B/SLBP/MXD3/KIF22/NUP205/HMGB2/PSIP1/MMS22L/CDKN2A/TUBG1/TIPIN/ORC6/PNN/DCLRE1B/POLA2/NASP/LUC7L3/IPO7/MYBL2/RAD51AP1/HMGA1/MYC/MCM6/DNMT1/ILF3/…
HALLMARK_KRAS_SIGNALING_DN	HALLMARK_KRAS_SIGNALING_DN	HALLMARK_KRAS_SIGNALING_DN	165	-0.447309	-1.74005	0.00175131	0.00733568	0.00386088	3733	tags=33%, list=13%, signal=29%	ITGB1BP2/GPR19/FGF22/ENTPD7/CNTFR/CELSR2/GPR3/BRDT/GDNF/HTR1B/NGB/KLHDC8A/ATP4A/MSH5/GRID2/HTR1D/SMPX/NR6A1/CAPN9/ALOX12B/NPHS1/SLC38A3/DLK2/YBX2/NUDT11/ACTC1/PCDHB1/BMPR1B/IGFBP2/KCNN1/PKP1/SERPINA10/RYR2/SLC6A3/CHRNG/KRT5/CCNA1/ARHGDIG/WNT16/KRT15/EPHA5/EDN2/TENM2/SNCB/FGFR3/NOS1/KCNQ2/SPTBN2/TNNI3/CALCB/TEX15/KRT13/COL2A1
HALLMARK_MYC_TARGETS_V1	HALLMARK_MYC_TARGETS_V1	HALLMARK_MYC_TARGETS_V1	193	-0.449198	-1.7822	0.00175747	0.00733568	0.00386088	13954	tags=77%, list=48%, signal=40%	SET/EEF1B2/AIMP2/CYC1/NOP16/COX5A/FAM120A/SNRPD3/XPOT/IFRD1/UBA2/TARDBP/PRPF31/C1QBP/NHP2/PSMC6/TUFM/U2AF1/HNRNPD/HNRNPA2B1/SSBP1/EIF3J/SNRPB2/SRSF3/HNRNPC/G3BP1/EIF4G2/DDX18/EXOSC7/SNRPG/RPLP0/HNRNPA3/SRSF7/SRSF2/POLE3/NDUFAB1/YWHAE/SYNCRIP/ERH/ORC2/NCBP2/RSL1D1/PHB/SNRPD2/PSMB2/PSMD3/YWHAQ/CLNS1A/SNRPA/EIF3B/RPS6/MCM5/RPS10/CBX3/GSPT1/EIF2S1/PABPC4/TXNL4A/MRPL9/PHB2/CCT7/LSM7/HNRNPU/PABPC1/APEX…
HALLMARK_G2M_CHECKPOINT	HALLMARK_G2M_CHECKPOINT	HALLMARK_G2M_CHECKPOINT	189	-0.511138	-2.0198	0.0017762	0.00733568	0.00386088	9638	tags=65%, list=33%, signal=43%	CUL4A/HNRNPU/TNPO2/TRA2B/NOLC1/CHAF1A/ODF2/KPNA2/DTYMK/BRCA2/DDX39A/DBF4/HSPA8/SLC12A2/SRSF1/RBM14/CASP8AP2/CKS1B/LIG3/HMMR/TGFB1/SFPQ/KPNB1/PRIM2/AMD1/CDC7/SMC1A/RASAL2/RAD21/TMPO/CDC25B/KIF22/MNAT1/PRMT5/BUB3/ORC6/EFNA5/POLA2/NASP/MEIS1/MYBL2/HMGA1/MYC/E2F1/MCM6/SNRPD1/ILF3/XPO1/TACC3/BARD1/CBX1/PBK/PLK4/PTTG1/ODC1/NDC80/E2F3/MTF2/KIF20B/FBXO5/CDC6/CDKN3/RACGAP1/KIF11/CDC45/MKI67/MAD2L1/FANCC/S…
HALLMARK_IL6_JAK_STAT3_SIGNALING	HALLMARK_IL6_JAK_STAT3_SIGNALING	HALLMARK_IL6_JAK_STAT3_SIGNALING	85	0.661342	2.38916	0.00225734	0.00733568	0.00386088	3246	tags=44%, list=11%, signal=39%	PLA2G2A/LTB/CXCL9/CXCL11/CXCL10/CD36/CD38/CXCL13/IL2RA/EBI3/IL2RG/CXCL1/IL12RB1/TNFRSF1B/CD14/CSF2RB/ACVRL1/CSF3R/IRF1/IL7/IL15RA/PIK3R5/CSF2RA/CSF1/MAP3K8/IL6/IL18R1/STAT1/TLR2/CCR1/IL6ST/A2M/TNF/IL9R/IFNGR1/OSMR/IL3RA
HALLMARK_APOPTOSIS	HALLMARK_APOPTOSIS	HALLMARK_APOPTOSIS	158	0.404887	1.60636	0.00228833	0.00733568	0.00386088	4101	tags=28%, list=14%, signal=24%	CD38/CD2/CD69/FASLG/GPX3/IL18/BIRC3/CLU/CD14/CASP1/PRF1/GSN/IRF1/ISG20/TGFBR3/PLCB2/TXNIP/IGFBP6/SOD2/IL6/RHOB/CASP4/GCH1/GNA15/BTG2/DCN/TNFSF10/GADD45B/TIMP3/TNF/IFNGR1/CFLAR/ERBB3/ATF3/DPYD/PLAT/ANXA1/EREG/TAP1/SAT1/BCL2L2/IFITM3/FEZ1/EGR3
HALLMARK_ALLOGRAFT_REJECTION	HALLMARK_ALLOGRAFT_REJECTION	HALLMARK_ALLOGRAFT_REJECTION	191	0.737195	2.97474	0.00229358	0.00733568	0.00386088	3632	tags=59%, list=13%, signal=52%	CD79A/ELANE/LTB/CD40LG/CCL19/CCL22/CXCL9/CFP/IL12B/TRAT1/CD3E/CD3D/CXCL13/HLA-DOB/CD3G/LCK/IL2RA/CXCR3/CD2/IL2RG/ZAP70/FASLG/CCL5/CD247/SIT1/ITGAL/IL18/NCR1/MAP4K1/ITK/CD8B/KRT1/CCR2/IRF8/CD96/CD8A/CCR5/IL18RAP/IL2RB/IL16/IL12RB1/PTPN6/NCF4/PTPRC/WAS/CD1D/CTSS/HLA-DMB/LY86/CCL2/LCP2/GZMA/IGSF6/CD40/GPR65/ITGB2/HLA-DQA1/IRF4/CD4/CD74/CCL4/PRF1/STAT4/LY75/IL13/HLA-DMA/HCLS1/IL7/HLA-DOA/HLA-DRA/FGR/…
HALLMARK_ADIPOGENESIS	HALLMARK_ADIPOGENESIS	HALLMARK_ADIPOGENESIS	190	0.491478	1.98049	0.00230415	0.00733568	0.00386088	6329	tags=31%, list=22%, signal=24%	CYP4B1/FABP4/CD36/C3/GPX3/SNCG/LIPE/UCP2/MRAP/LEP/SULT1A1/RETN/APOE/PPARG/LTC4S/ENPP2/STOM/ABCA1/SCARB1/ALDH2/MGLL/ANGPT1/IFNGR1/STAT5A/SPARCL1/ACADS/ITIH5/MARC2/FZD4/PLIN2/ANGPTL4/LAMA4/DRAM2/PTGER3/BCL6/ITGA7/IDH1/LPL/DHRS7B/ME1/CD302/OMD/ECH1/SLC27A1/SORBS1/CAT/LIFR/LPCAT3/GPX4/PREB/PPM1B/PIM3/PHLDB1/CRAT/REEP5/TST/EPHX2/APLP2
HALLMARK_INTERFERON_ALPHA_RESPONSE	HALLMARK_INTERFERON_ALPHA_RESPONSE	HALLMARK_INTERFERON_ALPHA_RESPONSE	95	0.760395	2.79168	0.00230947	0.00733568	0.00386088	4923	tags=72%, list=17%, signal=60%	CXCL11/CXCL10/SELL/GBP4/C1S/BATF2/PROCR/LAMP3/CASP1/CD74/RSAD2/IFIT2/IRF1/ISG20/OAS1/IL7/IFIT3/IFI44L/TXNIP/OASL/CSF1/CCRL2/HERC6/MX1/LPAR6/LAP3/IFIH1/SAMD9L/BST2/IFI35/TMEM140/DHX58/PSMB9/RTP4/IL15/TRIM14/B2M/UBE2L6/EPSTI1/SAMD9/IFITM1/IRF7/CMPK2/IFI27/GBP2/PSMB8/HLA-C/PARP14/PSME1/SP110/LGALS3BP/IFI30/TAP1/PLSCR1/UBA7/IFITM3/DDX60/ISG15/IFITM2/NMI/USP18/IRF2/NCOA7/TRIM21/ELF1/LY6E/TDRD7/PSME2
HALLMARK_KRAS_SIGNALING_UP	HALLMARK_KRAS_SIGNALING_UP	HALLMARK_KRAS_SIGNALING_UP	193	0.410309	1.6588	0.00230947	0.00733568	0.00386088	3496	tags=34%, list=12%, signal=30%	CXCL10/BTC/IL2RG/ADAMDEC1/CFB/MAP4K1/F13A1/IL10RA/IKZF1/APOD/IRF8/ALDH1A3/CD37/PIGR/TMEM176B/TLR8/TRAF1/TMEM176A/BIRC3/TNFRSF1B/CTSS/DOCK2/ITGB2/KLF4/FUCA1/SLPI/FCER1G/SERPINA3/SCN1B/TFPI/C3AR1/NGF/RETN/ST6GAL1/CSF2RA/CAB39L/GFPT2/LCP1/EPB41L3/LY96/IL33/FGF9/HSD11B1/CMKLR1/VWA5A/IL7R/GPRC5B/GYPC/HBEGF/AKAP12/PECAM1/CXCR4/ACE/TMEM100/PSMB8/SPARCL1/IGF2/LAT2/GLRX/GNG11/IGFBP3/MAP3K1/LAPTM5/PLAT/ERE…
HALLMARK_IL2_STAT5_SIGNALING	HALLMARK_IL2_STAT5_SIGNALING	HALLMARK_IL2_STAT5_SIGNALING	194	0.421756	1.70582	0.00231481	0.00733568	0.00386088	3927	tags=29%, list=14%, signal=25%	LTB/CXCL10/SELL/CCR4/IL2RA/CD48/CD79B/IL1RL1/ICOS/IL10RA/IRF8/RHOH/GBP4/IL2RB/BATF/FGL2/TRAF1/EOMES/SMPDL3A/TNFRSF1B/DHRS3/CST7/GPR65/SELP/IRF4/IL13/CTLA4/SCN9A/TLR7/CSF1/MAP3K8/RHOB/CD86/FLT3LG/IL18R1/SYNGR2/SHE/TNFSF10/GADD45B/IKZF2/TNFRSF8/AHR/PRKCH/IFNGR1/BATF3/LRRC8C/GABARAPL1/MUC1/IL3RA/HOPX/ITIH5/ITGA6/IL10/PLIN2/PLSCR1/IFITM3
HALLMARK_COMPLEMENT	HALLMARK_COMPLEMENT	HALLMARK_COMPLEMENT	198	0.526073	2.1302	0.00232558	0.00733568	0.00386088	4369	tags=43%, list=15%, signal=37%	C4BPB/CR2/CD40LG/LTF/F10/CD36/GZMK/LCK/CP/C3/CR1/CCL5/CFB/C1QA/FCN1/S100A9/C9/C1QC/CXCL1/C1R/C1S/CLU/SERPING1/WAS/CTSS/PLEK/LCP2/GZMA/CASP1/SPOCK2/PIK3CG/LGMN/SERPINB2/IRF1/FCER1G/ADRA2B/CTSC/APOC1/RASGRP1/PIK3R5/CASP5/ITGAM/APOBEC3G/CASP10/IL6/SERPINA1/CASP4/LAP3/S100A12/PRSS36/GNGT2/LYN/F7/PSMB9/FYN/C2/GP1BA/F8/CD55/ZFPM2/IRF7/PLA2G4A/CTSH/CSRP1/GCA/PLA2G7/PDGFB/GNG2/NOTCH4/ITIH1/PLAT/CPM/CTSO/…
HALLMARK_INTERFERON_GAMMA_RESPONSE	HALLMARK_INTERFERON_GAMMA_RESPONSE	HALLMARK_INTERFERON_GAMMA_RESPONSE	198	0.745852	3.02014	0.00232558	0.00733568	0.00386088	4923	tags=66%, list=17%, signal=55%	IDO1/CXCL9/ZBP1/CXCL11/CXCL10/GPR18/CD38/CD69/CCL5/CFB/SLAMF7/METTL7B/IL10RA/IRF8/ITGB7/GBP4/BANK1/IL2RB/TNFAIP2/C1R/PTPN6/FGL2/C1S/BATF2/KLRK1/XCL1/SERPING1/P2RY14/CSF2RB/CCL2/LCP2/GZMA/CIITA/SAMHD1/CD40/SELP/CASP1/HLA-DQA1/IRF4/CD74/RSAD2/STAT4/IFIT2/HLA-DMA/IRF1/ISG20/FPR1/IL7/IFIT3/IL15RA/VAMP8/IFI44L/APOL6/IL18BP/TXNIP/OASL/OAS2/HLA-DRB1/SOD2/IL6/HERC6/IRF5/CD86/MX1/CASP4/LAP3/IFIH1/IFIT1/SA…
HALLMARK_TNFA_SIGNALING_VIA_NFKB	HALLMARK_TNFA_SIGNALING_VIA_NFKB	HALLMARK_TNFA_SIGNALING_VIA_NFKB	198	0.521124	2.11016	0.00232558	0.00733568	0.00386088	5588	tags=48%, list=19%, signal=39%	CXCL11/CXCL10/IL12B/CD69/CCL5/IL18/CXCL1/TNFAIP2/PTX3/TRAF1/BIRC3/PLEK/CCL2/DRAM1/CXCL2/AREG/CCL4/KLF4/KLF2/IFIT2/CEBPD/SERPINB2/IRF1/IL15RA/GFPT2/CSF1/CXCL6/MAP3K8/ZFP36/SOD2/CCRL2/IL6/EGR2/RHOB/IFIH1/GCH1/BTG2/IL7R/NR4A1/NINJ1/DUSP1/SLC2A6/HBEGF/ABCA1/GADD45B/TLR2/KLF9/IL6ST/ACKR3/TNFSF9/TNF/PTPRE/CFLAR/SMAD3/NAMPT/ICAM1/STAT5A/NFKBIA/MARCKS/EDN1/ATF3/PTGER4/TAP1/DDX58/TRIP10/SNN/CD80/SAT1/MAFF…
HALLMARK_COAGULATION	HALLMARK_COAGULATION	HALLMARK_COAGULATION	126	0.436432	1.67826	0.00234192	0.00733568	0.00386088	3877	tags=37%, list=13%, signal=32%	CFD/F10/MMP3/C3/CFB/C1QA/C9/CTSE/C1R/C1S/CLU/SERPING1/PROS1/PLEK/TF/FBN1/RGN/LGMN/GSN/SERPINB2/APOC1/SERPINA1/VWF/RAPGEF3/FYN/TIMP3/C2/CAPN5/GP1BA/F8/HPN/PECAM1/A2M/CTSH/CSRP1/DCT/THBD/PDGFB/ITIH1/PLAT/ANXA1/CFI/THBS1/C8G/ACOX2/CTSO
HALLMARK_INFLAMMATORY_RESPONSE	HALLMARK_INFLAMMATORY_RESPONSE	HALLMARK_INFLAMMATORY_RESPONSE	196	0.648875	2.62329	0.00234742	0.00733568	0.00386088	3632	tags=49%, list=13%, signal=44%	MARCO/CCL17/CCR7/CCL22/CXCL9/CXCL11/CXCL10/SELL/IL12B/LCK/LTA/CD48/TACR1/EBI3/CD69/CCL5/NMUR1/IL18/CXCR6/SLAMF1/IL10RA/KCNA3/IL18RAP/IL2RB/CYBB/TNFRSF1B/CCL24/CD14/CCL2/LCP2/LAMP3/CSF3R/CD40/FFAR2/GPR132/BDKRB1/IRF1/FPR1/SCN1B/IL15RA/C3AR1/RASGRP1/PIK3R5/NLRP3/CX3CL1/CSF1/CXCL6/STAB1/SELE/CCRL2/IL6/TNFSF15/PTAFR/TLR3/P2RX7/GCH1/BST2/CMKLR1/GNA15/BTG2/IL7R/LYN/IL18R1/RTP4/BEST1/SLC4A4/IL15/SLC7A2/…
HALLMARK_SPERMATOGENESIS	HALLMARK_SPERMATOGENESIS	HALLMARK_SPERMATOGENESIS	108	-0.417546	-1.53297	0.00528169	0.0155344	0.00817599	3575	tags=25%, list=12%, signal=22%	EZH2/AURKA/RFC4/PCSK1N/NCAPH/TTK/BUB1/NEK2/CCNB2/MLF1/KIF2C/YBX2/PACRG/IL13RA2/CHRM4/ALOX15/CLGN/NEFH/CNIH2/GAD1/CCNA1/TEKT2/DDX25/NOS1/TNNI3/DMRT1
HALLMARK_FATTY_ACID_METABOLISM	HALLMARK_FATTY_ACID_METABOLISM	HALLMARK_FATTY_ACID_METABOLISM	152	0.361232	1.41354	0.0143541	0.0398724	0.0209855	5049	tags=24%, list=17%, signal=20%	ALDH1A1/ADH1C/AQP7/CD36/CA4/HAO2/CD1D/ACSL5/INMT/IL4I1/AOC3/ALDH3A1/MAOA/CA6/LTC4S/UBE2L6/MGLL/GLUL/HPGD/GABARAPL1/SERINC1/ACADS/PSME1/ALDH3A2/ACSS1/AUH/CYP4A11/IDH1/TP53INP2/G0S2/GPD1/ME1/ACSL1/ECH1/BLVRA/MLYCD
HALLMARK_MYC_TARGETS_V2	HALLMARK_MYC_TARGETS_V2	HALLMARK_MYC_TARGETS_V2	58	-0.464636	-1.53251	0.0196429	0.0516917	0.0272062	11223	tags=74%, list=39%, signal=46%	DDX18/GRWD1/SUPV3L1/PPAN/PHB/MPHOSPH10/MCM5/CBX3/FARSA/EXOSC5/SLC29A2/DCTPP1/TCOF1/PUS1/NOLC1/NOC4L/PRMT3/RCL1/NOP2/HSPE1/RRP12/NPM1/PPRC1/WDR43/NIP7/NOP56/HSPD1/BYSL/TFB2M/SRM/MRTO4/MYC/GNL3/PLK4/UNG/IPO4/RRP9/MCM4/SLC19A1/PLK1/TMEM97/HK2
HALLMARK_ESTROGEN_RESPONSE_EARLY	HALLMARK_ESTROGEN_RESPONSE_EARLY	HALLMARK_ESTROGEN_RESPONSE_EARLY	191	-0.335068	-1.32722	0.0212014	0.0526094	0.0276892	3622	tags=22%, list=13%, signal=19%	OPN3/NBL1/SLC7A5/NAV2/FARP1/CELSR2/REEP1/ELOVL2/IL17RB/FASN/TFF3/ESRP2/CA12/TUBB2B/CELSR1/RHOD/MPPED2/CALB2/GJA1/TGIF2/DHCR7/SYT12/TTC39A/KLK10/FOXC1/MLPH/IGF1R/PGR/CLDN7/SOX3/CLIC3/TFAP2C/PMAIP1/KRT19/GREB1/KRT18/KRT15/SLC2A1/WWC1/KRT8/KRT13
HALLMARK_XENOBIOTIC_METABOLISM	HALLMARK_XENOBIOTIC_METABOLISM	HALLMARK_XENOBIOTIC_METABOLISM	185	0.332154	1.33862	0.0226244	0.0526094	0.0276892	4935	tags=28%, list=17%, signal=23%	ADH1C/F10/AOX1/CD36/CYP2C18/ABCC2/CFB/CRP/IRF8/HSD17B2/PTGDS/TMEM176B/PROS1/APOE/ALDH3A1/PTGES/MAOA/GCH1/PSMB10/HSD11B1/PDK4/BLVRB/CYFIP2/NINJ1/AKR1C2/FBLN1/ABCD2/CES1/FBP1/UPB1/ALDH2/NDRG2/IGFBP4/GABARAPL1/ITIH1/CNDP2/IGF1/PINK1/ACOX2/PAPSS2/AKR1C3/MAN1A1/DDAH2/ATOH8/TNFRSF1A/TPST1/IDH1/ACP2/ECH1/CAT/ABCC3/IL1R1
HALLMARK_MYOGENESIS	HALLMARK_MYOGENESIS	HALLMARK_MYOGENESIS	194	0.324056	1.31067	0.0231481	0.0526094	0.0276892	3771	tags=26%, list=13%, signal=23%	CFD/SGCG/CD36/MYLPF/GPX3/TNNC2/TNNT3/APOD/MYH2/CLU/FABP3/FXYD1/PTGIS/HRC/GSN/GJA5/PYGM/LAMA2/CKMT2/ITGB4/BDKRB2/DTNA/SOD3/ABLIM1/SYNGR2/LSP1/VIPR1/HBEGF/SH3BGR/GADD45B/TNNI2/ACTA1/SLN/FST/MYOM1/ACHE/IGFBP7/MYH11/MYH1/FGF2/ERBB3/RB1/MB/CRYAB/IGFBP3/CKM/IGF1/DMD/TAGLN/SMTN
HALLMARK_HEDGEHOG_SIGNALING	HALLMARK_HEDGEHOG_SIGNALING	HALLMARK_HEDGEHOG_SIGNALING	35	-0.510272	-1.52344	0.0272727	0.0578704	0.0304581	3392	tags=46%, list=12%, signal=40%	TLE1/VEGFA/UNC5C/CNTFR/HEY2/SCG2/CELSR1/PLG/GLI1/CRMP1/NRP2/SLIT1/PTCH1/CDK5R1/NKX6-1
HALLMARK_GLYCOLYSIS	HALLMARK_GLYCOLYSIS	HALLMARK_GLYCOLYSIS	196	-0.33346	-1.32972	0.0277778	0.0578704	0.0304581	10566	tags=46%, list=36%, signal=29%	GOT1/ADORA2B/CASP6/TALDO1/PMM2/MIOX/PHKA2/GYS1/PRPS1/SPAG4/SRD5A3/TSTA3/CHPF2/DSC2/ALDOA/PFKP/ABCB6/HS2ST1/LHX9/PGAM1/P4HA2/ALDH7A1/PAXIP1/FUT8/HDLBP/GYS2/B3GAT3/HMMR/ZNF292/NANP/MET/CHPF/LCT/CHST6/B3GALT6/ARPP19/BPNT1/NASP/CD44/MIF/ALDOB/FKBP4/KIF2A/TKTL1/PLOD1/PKM/B4GALT2/TPI1/PGM2/VEGFA/AK4/COL5A1/PC/SOX9/TPBG/LDHA/GALE/CENPA/FAM162A/GPC4/IER3/B3GAT1/P4HA1/STMN1/CDK1/AGRN/PGK1/AURKA/ENO2/TFF3/…
HALLMARK_BILE_ACID_METABOLISM	HALLMARK_BILE_ACID_METABOLISM	HALLMARK_BILE_ACID_METABOLISM	107	0.368675	1.39545	0.0410959	0.0821918	0.0432588	5089	tags=25%, list=18%, signal=21%	ALDH1A1/ABCA9/ABCA6/ABCA8/LCK/SLC27A2/LIPE/RXRG/ACSL5/CYP7A1/SOAT2/ABCA1/CYP8B1/ABCD2/HSD3B7/OPTN/BMP6/HSD17B6/PEX11A/IDH1/NR3C2/GSTK1/ACSL1/PEX11G/CAT/MLYCD/ALDH8A1
HALLMARK_TGF_BETA_SIGNALING	HALLMARK_TGF_BETA_SIGNALING	HALLMARK_TGF_BETA_SIGNALING	54	-0.424797	-1.37398	0.0521583	0.100304	0.0527918	5756	tags=26%, list=20%, signal=21%	RAB31/ID2/SMAD1/SLC20A1/PMEPA1/ID3/BCAR3/ID1/LEFTY2/SERPINE1/CDH1/BMP2/NOG
HALLMARK_EPITHELIAL_MESENCHYMAL_TRANSITION	HALLMARK_EPITHELIAL_MESENCHYMAL_TRANSITION	HALLMARK_EPITHELIAL_MESENCHYMAL_TRANSITION	197	-0.317034	-1.2641	0.0541958	0.100363	0.0528224	5633	tags=34%, list=19%, signal=28%	JUN/VEGFA/COL12A1/ITGAV/MCM7/PFN2/COL5A1/PVR/COL5A2/ITGB1/HTRA1/ID2/VIM/FAP/LGALS1/COL6A3/TNC/PMEPA1/COL1A2/LAMA1/APLP1/EDIL3/SPP1/P3H1/COL8A2/ENO2/MMP14/COL1A1/SCG2/FN1/FBN2/CTHRC1/BGN/CDH11/GJA1/SLC6A8/CAPG/LOXL2/ANPEP/ADAM12/MATN3/CADM1/POSTN/INHBA/COL16A1/FZD8/PLAUR/ITGA2/IGFBP2/TNFRSF12A/COMP/CDH6/PLOD2/SERPINE1/FOXC2/SDC1/WNT5A/COL7A1/TGFBI/RGS4/CRLF1/SFRP4/OXTR/CDH2/LRRC15/COL11A1
HALLMARK_PI3K_AKT_MTOR_SIGNALING	HALLMARK_PI3K_AKT_MTOR_SIGNALING	HALLMARK_PI3K_AKT_MTOR_SIGNALING	101	0.36337	1.35554	0.0573394	0.102392	0.0538905	5926	tags=30%, list=20%, signal=24%	LCK/IL2RG/FASLG/SLA/DAPP1/NGF/CAB39L/PRKCB/NOD1/RPS6KA1/CDK4/IL4/CXCR4/MKNK1/PRKAA2/ADCY2/TRIB3/TNFRSF1A/MYD88/PLCB1/MKNK2/SQSTM1/FGF17/NCK1/GRB2/EGFR/DUSP3/RPTOR/MAPK10/CAB39
HALLMARK_REACTIVE_OXYGEN_SPECIES_PATHWAY	HALLMARK_REACTIVE_OXYGEN_SPECIES_PATHWAY	HALLMARK_REACTIVE_OXYGEN_SPECIES_PATHWAY	47	0.433491	1.39207	0.0656455	0.113182	0.0595694	5588	tags=34%, list=19%, signal=28%	GPX3/MBP/SOD2/MPO/MGST1/LSP1/IPCEF1/HHEX/GLRX/FES/PDLIM1/FTL/PRNP/CAT/GPX4/JUNB
HALLMARK_MITOTIC_SPINDLE	HALLMARK_MITOTIC_SPINDLE	HALLMARK_MITOTIC_SPINDLE	198	-0.304779	-1.21634	0.0856643	0.142774	0.0751442	9320	tags=39%, list=32%, signal=27%	MYO1E/CEP57/BRCA2/SORBS2/RHOT2/RASA1/PPP4R2/RFC1/KPTN/RANBP9/NIN/TIAM1/SMC1A/RASAL2/SMC3/BCL2L11/CDC42BPA/PLEKHG2/PCNT/KIF22/CEP192/KIF1B/ACTN4/FGD6/FLNB/MYH9/CKAP5/CCDC88A/ALMS1/SASS6/PIF1/DLG1/FSCN1/NDC80/KIF20B/FBXO5/KNTC1/RACGAP1/KIF11/BCAR1/CEP72/SAC3D1/INCENP/ECT2/CEP131/PRC1/KIF23/WASF1/NUSAP1/CNTROB/CDK1/ESPL1/LMNB1/FARP1/CENPE/KIF3C/AURKA/SMC4/KIF15/ANLN/TOP2A/CENPJ/BIRC5/TPX2/TTK/KIF4A/…
HALLMARK_PANCREAS_BETA_CELLS	HALLMARK_PANCREAS_BETA_CELLS	HALLMARK_PANCREAS_BETA_CELLS	30	-0.473702	-1.35436	0.0934066	0.150656	0.0792925	2955	tags=23%, list=10%, signal=21%	GCK/NKX2-2/NKX6-1/DCX/FOXA2/SYT13
HALLMARK_APICAL_SURFACE	HALLMARK_APICAL_SURFACE	HALLMARK_APICAL_SURFACE	42	0.418686	1.31232	0.125	0.195312	0.102796	2150	tags=24%, list=7%, signal=22%	IL2RG/GHRL/IL2RB/MAL/CX3CL1/AFAP1L2/CD160/LYN/RHCG/SLC2A4
HALLMARK_APICAL_JUNCTION	HALLMARK_APICAL_JUNCTION	HALLMARK_APICAL_JUNCTION	189	-0.285311	-1.12743	0.20071	0.304107	0.160056	3464	tags=18%, list=12%, signal=16%	CRB3/ACTN3/CDH4/NRTN/ICAM5/CDH11/TRO/AMH/ATP1A3/CALB2/CLDN6/PARD6G/COL9A1/MYH10/COL16A1/CLDN7/ACTC1/ITGA2/SHROOM2/CDH6/CDH15/GRB7/DSC1/DMP1/CDH8/CDH1/TGFBI/CLDN14/WNK4/CLDN9/CNTN1/ITGA10/MMP9
HALLMARK_ESTROGEN_RESPONSE_LATE	HALLMARK_ESTROGEN_RESPONSE_LATE	HALLMARK_ESTROGEN_RESPONSE_LATE	193	-0.281343	-1.11623	0.217926	0.32048	0.168674	5661	tags=27%, list=20%, signal=22%	PLK4/HSPA4L/DHRS2/DNAJC12/RAB31/RNASEH2A/SLC16A1/CDC6/FABP5/TPD52L1/TPBG/ID2/GALE/DLG5/BTG3/OPN3/NBL1/SLC7A5/GINS2/LSR/FARP1/CELSR2/IL17RB/TFF3/CA12/TOP2A/KIF20A/STIL/CACNA2D2/PERP/DHCR7/KLK10/FOXC1/PGR/ASCL1/NMU/SOX3/HOMER2/CLIC3/CDC20/TFAP2C/IGSF1/CA2/KRT19/CCNA1/CDH1/TNNC1/PRLR/FGFR3/CHST8/KRT13
HALLMARK_WNT_BETA_CATENIN_SIGNALING	HALLMARK_WNT_BETA_CATENIN_SIGNALING	HALLMARK_WNT_BETA_CATENIN_SIGNALING	41	-0.365128	-1.12225	0.289091	0.412987	0.217362	4812	tags=29%, list=17%, signal=24%	CTNNB1/SKP2/KAT2A/NKD1/WNT6/HEY2/FZD1/LEF1/FZD8/PTCH1/WNT5B
HALLMARK_P53_PATHWAY	HALLMARK_P53_PATHWAY	HALLMARK_P53_PATHWAY	193	0.260055	1.05136	0.344111	0.477932	0.251543	4790	tags=22%, list=17%, signal=19%	PROCR/ALOX15B/DRAM1/CASP1/TGFA/KLF4/FUCA1/VAMP8/TXNIP/ITGB4/LRMP/RHBDF2/CEBPA/GPX2/DEF6/SESN1/ZBTB16/BTG2/VWA5A/CYFIP2/NINJ1/TCN2/STOM/HBEGF/ADA/TNFSF9/PTPRE/RB1/ATF3/MDM2/WWP1/IFI30/TAP1/SAT1/ACVR1B/TRIB3/BTG1/MKNK2/PLK2/INHBB/DGKA/ISCU/FGF13
HALLMARK_HEME_METABOLISM	HALLMARK_HEME_METABOLISM	HALLMARK_HEME_METABOLISM	187	0.256147	1.03226	0.369369	0.499148	0.262709	5982	tags=25%, list=21%, signal=20%	C3/SPTA1/ACKR1/CTSE/AQP3/TRIM10/ACSL6/UCP2/ALDH1L1/TRIM58/CLIC2/SNCA/BTG2/BLVRB/TNS1/GYPC/LMO2/SELENBP1/GYPE/MPP1/HBB/TSPO2/CCDC28A/OPTN/SLC4A1/KEL/DMTN/NCOA4/HTATIP2/EPOR/NFE2/ENDOD1/CAT/EZH1/SIDT2/BLVRA/GATA1/ELL2/USP15/BCAM/ADD1/HEBP1/KAT2B/NFE2L1/TAL1/NR3C1
HALLMARK_PEROXISOME	HALLMARK_PEROXISOME	HALLMARK_PEROXISOME	101	0.251383	0.937773	0.568807	0.747807	0.393583	2471	tags=11%, list=9%, signal=10%	ALDH1A1/SLC27A2/HAO2/RXRG/DHRS3/ACSL5/ABCC8/SOD2/SEMA3C/STS/ABCD2
HALLMARK_UV_RESPONSE_UP	HALLMARK_UV_RESPONSE_UP	HALLMARK_UV_RESPONSE_UP	153	-0.242998	-0.939076	0.590361	0.747807	0.393583	4308	tags=20%, list=15%, signal=17%	PRPF3/CCNE1/SHOX2/MRPL23/RRAD/TYRO3/GGH/FEN1/BTG3/NKX2-5/MAPK8IP2/RFC4/ENO2/MMP14/PPAT/PLCL1/SLC6A8/TCHH/TFRC/CTSV/NPTX2/LHX2/EPCAM/IGFBP2/CA2/ONECUT1/BMP2/HTR7/COL2A1
HALLMARK_MTORC1_SIGNALING	HALLMARK_MTORC1_SIGNALING	HALLMARK_MTORC1_SIGNALING	194	-0.238075	-0.945303	0.598246	0.747807	0.393583	11211	tags=46%, list=39%, signal=28%	ACTR2/HSPA4/SYTL2/SERP1/SLC7A11/PSMB5/GPI/ATP6V1D/IDI1/GSR/SC5D/GOT1/FADS1/RPN1/SDF2L1/UCHL5/RPA1/RIT1/ACTR3/ALDOA/FADS2/GAPDH/DDX39A/BCAT1/PDK1/GSK3B/HMBS/TM7SF2/SLC6A6/HSPE1/FKBP2/PHGDH/ASNS/SLC1A4/HPRT1/EBP/NUFIP1/CYP51A1/SLC1A5/HSPD1/CCT6A/NUP205/TOMM40/TUBG1/CACYBP/PSAT1/DHFR/GMPS/CALR/STIP1/TPI1/SERPINH1/EEF1E1/FDXR/UNG/ACACA/PNP/AK4/PSMG1/HMGCS1/LDHA/HMGCR/SHMT2/RRP9/MCM4/DHCR24/P4HA1/CDC2…
HALLMARK_NOTCH_SIGNALING	HALLMARK_NOTCH_SIGNALING	HALLMARK_NOTCH_SIGNALING	32	-0.283865	-0.832786	0.71875	0.876524	0.461329	5433	tags=19%, list=19%, signal=15%	KAT2A/PRKCA/FZD5/FZD1/WNT5A
HALLMARK_ANGIOGENESIS	HALLMARK_ANGIOGENESIS	HALLMARK_ANGIOGENESIS	35	0.250365	0.757217	0.823009	0.979772	0.51567	6014	tags=29%, list=21%, signal=23%	CXCL6/SERPINA5/FSTL1/PRG2/THBD/LPL/KCNJ8/S100A4/SLCO2A1/VTN
HALLMARK_HYPOXIA	HALLMARK_HYPOXIA	HALLMARK_HYPOXIA	188	0.205951	0.830929	0.899103	1	0.526316	3404	tags=15%, list=12%, signal=14%	BRS3/CP/PHKG1/PLAC8/SLC2A5/ISG20/PYGM/ZFP36/PPARGC1A/IL6/DTNA/LDHC/DCN/LXN/DUSP1/AKAP12/HAS1/FBP1/SCARB1/ACKR3/SELENBP1/CXCR4/PDGFB/SDC3/ATF3/GLRX/IGFBP3/MAP3K1/NDST2
HALLMARK_UNFOLDED_PROTEIN_RESPONSE	HALLMARK_UNFOLDED_PROTEIN_RESPONSE	HALLMARK_UNFOLDED_PROTEIN_RESPONSE	106	-0.205546	-0.751609	0.948582	1	0.526316	11633	tags=45%, list=40%, signal=27%	HSPA5/HSP90B1/DCP1A/TTC37/SERP1/SPCS3/KDELR3/KHSRP/TATDN2/SHC1/EDC4/EIF2S1/ZBTB17/EXOSC5/DKC1/YWHAZ/NOLC1/LSM4/SRPRB/SEC31A/HYOU1/FUS/EIF4A2/ARFGAP1/CKS1B/NPM1/EIF4G1/ASNS/SLC1A4/BANF1/NOP56/EXOSC4/PSAT1/YIF1A/DDX10/CALR/ALDH18A1/PDIA5/PDIA6/VEGFA/TUBB2A/EIF4EBP1/EIF4A1/CHAC1/RRP9/SLC7A5/NFYA
HALLMARK_CHOLESTEROL_HOMEOSTASIS	HALLMARK_CHOLESTEROL_HOMEOSTASIS	HALLMARK_CHOLESTEROL_HOMEOSTASIS	73	0.195705	0.689776	0.952703	1	0.526316	5088	tags=21%, list=18%, signal=17%	ADH4/CLU/LGMN/ATF5/PPARG/CXCL16/FBXO6/ATF3/SEMA3B/ACSS2/PLSCR1/TRIB3/LPL/ECH1/PNRC1
HALLMARK_ANDROGEN_RESPONSE	HALLMARK_ANDROGEN_RESPONSE	HALLMARK_ANDROGEN_RESPONSE	95	-0.201563	-0.728508	0.964851	1	0.526316	4999	tags=16%, list=17%, signal=13%	HMGCR/LMAN1/ACTN1/NDRG1/ANKH/PMEPA1/DHCR24/ABCC4/TMPRSS2/HOMER2/BMPR1B/KRT19/KLK2/KRT8
HALLMARK_OXIDATIVE_PHOSPHORYLATION	HALLMARK_OXIDATIVE_PHOSPHORYLATION	HALLMARK_OXIDATIVE_PHOSPHORYLATION	184	0.185101	0.747116	0.991031	1	0.526316	22204	tags=99%, list=77%, signal=23%	POLR2F/PDK4/MAOB/SLC25A4/SURF1/IDH1/SLC25A20/ISCU/ACAT1/ECH1/GPX4/CYB5R3/CPT1A/SDHD/CYB5A/MPC1/ACAA1/ATP6V0E1/OGDH/RETSAT/HADHB/ACADSB/ATP6V1E1/ETFDH/ACAA2/DECR1/FDX1/PHYH/CASP7/ISCA1/IDH3A/NDUFA5/GLUD1/HCCS/NDUFA4/NDUFA2/SLC25A12/ACO2/POR/COX17/HTRA2/NDUFB3/NDUFA6/HADHA/BDH2/OAT/ALDH6A1/MTRR/MRPL34/NQO2/DLST/UQCR11/ETFA/MFN2/NDUFS1/ATP6AP1/DLD/UQCR10/PRDX3/UQCRC2/NDUFS7/VDAC3/MRPS11/SUCLA2/SDHC/…
HALLMARK_DNA_REPAIR	HALLMARK_DNA_REPAIR	HALLMARK_DNA_REPAIR	147	-0.17857	-0.688399	0.993186	1	0.526316	12262	tags=44%, list=42%, signal=26%	CANT1/POLR3C/RFC2/NT5C/RPA2/TAF1C/POLA1/DDB1/RPA3/SMAD5/NCBP2/RAE1/ITPA/POM121/RALA/TMED2/POLR2I/ERCC8/SEC61A1/RNMT/NELFE/UMPS/CSTF3/NUDT21/TAF6/POLR2D/RAD52/ALYREF/SF3A3/ZNRD1/VPS37B/GTF2H3/TARBP2/POLR2A/NME4/DGCR8/PRIM1/RFC5/POLR1D/HPRT1/ARL6IP1/POLD3/SSRP1/NELFCD/UPF3B/POLA2/POLR1C/POLR2H/PNP/TYMS/LIG1/SAC3D1/POLH/ERCC2/POLD1/RFC3/PCNA/FEN1/IMPDH2/STX3/VPS37D/ZWINT/NME1/RFC4
HALLMARK_UV_RESPONSE_DN	HALLMARK_UV_RESPONSE_DN	HALLMARK_UV_RESPONSE_DN	138	0.17729	0.687849	0.997658	1	0.526316	6031	tags=24%, list=21%, signal=19%	EFEMP1/DAB2/TGFBR3/TFPI/GRK5/PPARG/PMP22/ADD3/DUSP1/FYN/TGFBR2/DLC1/MGLL/SMAD3/CELF2/LPAR1/INPP4B/RBPMS/NFIB/FBLN5/KIT/ANXA4/PLCB4/PIK3CD/DBP/PTPRM/SYNE1/NFKB1/CAV1/PDGFRB/ICA1/NR3C1/CITED2
HALLMARK_PROTEIN_SECRETION	HALLMARK_PROTEIN_SECRETION	HALLMARK_PROTEIN_SECRETION	95	0.127787	0.469151	1	1	0.526316	7739	tags=23%, list=27%, signal=17%	TSPAN8/CTSC/ABCA1/STX12/CD63/SGMS1/STX7/GALC/EGFR/RAB9A/ICA1/VAMP3/CLN5/VAMP4/VAMP7/SCRN1/IGF2R/SNX2/M6PR/SNAP23/ARFIP1/YIPF6

## Sheet: Sheet2
	ID	Description	setSize	enrichmentScore	NES	pvalue	p.adjust	qvalues	rank	leading_edge	core_enrichment
KEGG_NEUROACTIVE_LIGAND_RECEPTOR_INTERACTION	KEGG_NEUROACTIVE_LIGAND_RECEPTOR_INTERACTION	KEGG_NEUROACTIVE_LIGAND_RECEPTOR_INTERACTION	218	-0.412631	-1.6612	0.00179211	0.0121608	0.00860274	3150	tags=29%, list=11%, signal=26%	PTGER2/NPFFR2/CHRM3/GRIA1/PTGER1/HTR1B/CHRNA6/GRIK4/PLG/GRIN3B/GPR156/GRID2/HTR1D/GRM2/DRD1/F2/CHRNB2/PTH1R/HTR1F/CHRNB4/F2RL2/CHRNA7/CHRND/CHRM2/CHRM4/LHB/GRIK3/ADRA1D/PRSS3/HCRTR1/DRD4/CRHR1/ADORA1/CHRNG/GABRA3/GRIA4/GABRR1/OPRK1/GRIN1/HTR7/RXFP1/CHRNA4/NMUR2/HTR6/LPAR3/PRLR/OXTR/GLP1R/GABBR2/KISS1R/GABRA5/GABRA2/CHRM1/CHRNA1/CCKBR/GRIA2/CHRNA9/GABRB1/GABRG3/GRM4/NTSR1/PRL
KEGG_HEDGEHOG_SIGNALING_PATHWAY	KEGG_HEDGEHOG_SIGNALING_PATHWAY	KEGG_HEDGEHOG_SIGNALING_PATHWAY	54	-0.539256	-1.76045	0.00181159	0.0121608	0.00860274	2859	tags=26%, list=10%, signal=23%	WNT6/WNT9A/GLI1/PTCH1/LRP2/WNT5A/WNT5B/BMP2/WNT16/HHIP/ZIC2/WNT7B/BMP5
KEGG_P53_SIGNALING_PATHWAY	KEGG_P53_SIGNALING_PATHWAY	KEGG_P53_SIGNALING_PATHWAY	67	-0.484257	-1.6386	0.00184162	0.0121608	0.00860274	4782	tags=30%, list=17%, signal=25%	CCNB3/CCNE1/CHEK1/CD82/CDK1/GTSE1/TP73/CCNE2/CCNB1/CCNB2/RRM2/RPRM/PERP/STEAP3/PMAIP1/SERPINE1/SERPINB5/TP53AIP1/BAI1
KEGG_ASTHMA	KEGG_ASTHMA	KEGG_ASTHMA	26	0.860755	2.43837	0.00210526	0.0121608	0.00860274	3644	tags=92%, list=13%, signal=81%	CD40LG/HLA-DOB/FCER1A/HLA-DMB/CD40/HLA-DQA1/HLA-DQA2/IL13/HLA-DMA/HLA-DPA1/HLA-DPB1/FCER1G/HLA-DOA/HLA-DRA/HLA-DRB5/HLA-DRB1/HLA-DQB1/MS4A2/CCL11/PRG2/TNF/IL4/IL10/RNASE3
KEGG_TOLL_LIKE_RECEPTOR_SIGNALING_PATHWAY	KEGG_TOLL_LIKE_RECEPTOR_SIGNALING_PATHWAY	KEGG_TOLL_LIKE_RECEPTOR_SIGNALING_PATHWAY	87	0.633706	2.28016	0.0021097	0.0121608	0.00860274	3432	tags=33%, list=12%, signal=29%	CXCL9/CXCL11/CXCL10/IL12B/LBP/CCL5/TLR4/TLR8/CD14/CD40/CCL4/CCL3/PIK3CG/TLR7/PIK3R5/MAP3K8/IL6/IRF5/CD86/TLR3/LY96/TLR5/STAT1/TLR2/IRF7/TNF/NFKBIA/TLR6/TLR1
KEGG_PRION_DISEASES	KEGG_PRION_DISEASES	KEGG_PRION_DISEASES	32	0.674862	1.98224	0.00211416	0.0121608	0.00860274	4969	tags=44%, list=17%, signal=36%	C7/CCL5/C1QB/C6/C1QA/C9/C1QC/IL6/FYN/C8G/MAPK3/PRNP/IL1A/IL1B
KEGG_ALLOGRAFT_REJECTION	KEGG_ALLOGRAFT_REJECTION	KEGG_ALLOGRAFT_REJECTION	34	0.854025	2.5236	0.00212314	0.0121608	0.00860274	4043	tags=91%, list=14%, signal=79%	CD40LG/IL12B/HLA-DOB/FASLG/HLA-DMB/CD40/HLA-DQA1/HLA-DQA2/PRF1/HLA-DMA/HLA-DPA1/HLA-DPB1/HLA-DOA/HLA-DRA/IFNG/HLA-DRB5/HLA-DRB1/HLA-DQB1/CD86/CD28/HLA-E/HLA-F/HLA-B/TNF/IL4/HLA-A/HLA-C/HLA-G/IL10/CD80/GZMB
KEGG_AUTOIMMUNE_THYROID_DISEASE	KEGG_AUTOIMMUNE_THYROID_DISEASE	KEGG_AUTOIMMUNE_THYROID_DISEASE	34	0.845505	2.49842	0.00212314	0.0121608	0.00860274	4043	tags=88%, list=14%, signal=76%	CD40LG/HLA-DOB/FASLG/HLA-DMB/CD40/HLA-DQA1/HLA-DQA2/PRF1/CTLA4/HLA-DMA/HLA-DPA1/HLA-DPB1/HLA-DOA/HLA-DRA/HLA-DRB5/HLA-DRB1/HLA-DQB1/CD86/CD28/HLA-E/HLA-F/HLA-B/IL4/HLA-A/HLA-C/HLA-G/IL10/CD80/TPO/GZMB
KEGG_PRIMARY_IMMUNODEFICIENCY	KEGG_PRIMARY_IMMUNODEFICIENCY	KEGG_PRIMARY_IMMUNODEFICIENCY	34	0.837907	2.47597	0.00212314	0.0121608	0.00860274	2328	tags=68%, list=8%, signal=62%	CD79A/TNFRSF13B/CD19/IGLL1/CD40LG/CD3E/CD3D/LCK/IL2RG/ZAP70/CD8B/ICOS/CD8A/PTPRC/AICDA/BTK/CIITA/CD40/CD4/JAK3/BLNK/IL7R/ADA
KEGG_LEISHMANIA_INFECTION	KEGG_LEISHMANIA_INFECTION	KEGG_LEISHMANIA_INFECTION	70	0.67607	2.33466	0.00215054	0.0121608	0.00860274	3166	tags=49%, list=11%, signal=43%	IL12B/HLA-DOB/NCF1/C3/CR1/TLR4/PTPN6/NCF4/HLA-DMB/ITGB2/HLA-DQA1/HLA-DQA2/HLA-DMA/HLA-DPA1/HLA-DPB1/HLA-DOA/HLA-DRA/IFNG/ITGAM/HLA-DRB5/HLA-DRB1/PRKCB/HLA-DQB1/NCF2/STAT1/FCGR1A/TLR2/FCGR3A/CYBA/TNF/IFNGR1/IL4/NFKBIA/FCGR2C
KEGG_GRAFT_VERSUS_HOST_DISEASE	KEGG_GRAFT_VERSUS_HOST_DISEASE	KEGG_GRAFT_VERSUS_HOST_DISEASE	36	0.838657	2.51764	0.0021645	0.0121608	0.00860274	4043	tags=92%, list=14%, signal=79%	HLA-DOB/FASLG/KIR3DL2/KIR3DL1/HLA-DMB/HLA-DQA1/HLA-DQA2/PRF1/HLA-DMA/HLA-DPA1/HLA-DPB1/HLA-DOA/KLRC1/HLA-DRA/KLRD1/KIR2DL1/IFNG/HLA-DRB5/HLA-DRB1/IL6/HLA-DQB1/CD86/CD28/HLA-E/KIR2DL3/HLA-F/HLA-B/TNF/HLA-A/HLA-C/HLA-G/CD80/GZMB
KEGG_HEMATOPOIETIC_CELL_LINEAGE	KEGG_HEMATOPOIETIC_CELL_LINEAGE	KEGG_HEMATOPOIETIC_CELL_LINEAGE	80	0.73913	2.60817	0.0021692	0.0121608	0.00860274	3273	tags=64%, list=11%, signal=57%	MS4A1/FCER2/CD19/CR2/CD1B/CD1E/CD1C/CD36/CD3E/CD38/CD3D/CD5/CD3G/IL2RA/CD2/IL5RA/CR1/FLT3/CD8B/CD8A/CD37/CD22/CD1D/CD14/CSF3R/CSF1R/CD4/CD34/IL7/CD33/HLA-DRA/CD1A/CSF2RA/ITGAM/HLA-DRB5/CSF1/HLA-DRB1/IL6/FLT3LG/IL7R/THPO/GP1BA/FCGR1A/CD55/ITGA1/TNF/IL9R/IL4/CD7/IL3RA/IL6R
KEGG_RETINOL_METABOLISM	KEGG_RETINOL_METABOLISM	KEGG_RETINOL_METABOLISM	39	0.580306	1.79218	0.00217391	0.0121608	0.00860274	968	tags=21%, list=3%, signal=20%	ADH1B/ALDH1A1/ADH1C/ADH1A/DHRS9/CYP2C18/ADH4/DHRS3
KEGG_TYPE_I_DIABETES_MELLITUS	KEGG_TYPE_I_DIABETES_MELLITUS	KEGG_TYPE_I_DIABETES_MELLITUS	39	0.667502	2.06147	0.00217391	0.0121608	0.00860274	4043	tags=72%, list=14%, signal=62%	IL12B/HLA-DOB/LTA/FASLG/HLA-DMB/HLA-DQA1/HLA-DQA2/PRF1/HLA-DMA/HLA-DPA1/HLA-DPB1/HLA-DOA/HLA-DRA/IFNG/HLA-DRB5/HLA-DRB1/HLA-DQB1/CD86/CD28/HLA-E/HLA-F/HLA-B/TNF/HLA-A/HLA-C/HLA-G/CD80/GZMB
KEGG_TYROSINE_METABOLISM	KEGG_TYROSINE_METABOLISM	KEGG_TYROSINE_METABOLISM	39	0.685388	2.11671	0.00217391	0.0121608	0.00860274	3175	tags=36%, list=11%, signal=32%	ADH1B/ADH1C/AOX1/ADH1A/HPD/ADH4/ALDH1A3/IL4I1/AOC3/ALDH3A1/MAOA/DCT/MAOB/ALDH3B1
KEGG_VIRAL_MYOCARDITIS	KEGG_VIRAL_MYOCARDITIS	KEGG_VIRAL_MYOCARDITIS	67	0.632899	2.16558	0.00217865	0.0121608	0.00860274	3826	tags=54%, list=13%, signal=47%	SGCG/CD40LG/HLA-DOB/ITGAL/MYH2/HLA-DMB/CD40/ITGB2/HLA-DQA1/HLA-DQA2/PRF1/HLA-DMA/HLA-DPA1/HLA-DPB1/HLA-DOA/LAMA2/HLA-DRA/HLA-DRB5/HLA-DRB1/HLA-DQB1/CD86/CD28/HLA-E/RAC2/HLA-F/HLA-B/FYN/CD55/MYH11/MYH1/ICAM1/HLA-A/HLA-C/HLA-G/DMD/CD80
KEGG_FC_EPSILON_RI_SIGNALING_PATHWAY	KEGG_FC_EPSILON_RI_SIGNALING_PATHWAY	KEGG_FC_EPSILON_RI_SIGNALING_PATHWAY	73	0.568897	1.97928	0.00218341	0.0121608	0.00860274	2911	tags=30%, list=10%, signal=27%	PLA2G2D/PLA2G2A/FCER1A/VAV1/BTK/LCP2/SYK/INPP5D/PIK3CG/IL13/PLCG2/FCER1G/PIK3R5/PRKCB/MS4A2/LYN/RAC2/PLA2G5/FYN/PLA2G4A/TNF/IL4
KEGG_FC_GAMMA_R_MEDIATED_PHAGOCYTOSIS	KEGG_FC_GAMMA_R_MEDIATED_PHAGOCYTOSIS	KEGG_FC_GAMMA_R_MEDIATED_PHAGOCYTOSIS	93	0.471698	1.70071	0.00218341	0.0121608	0.00860274	3443	tags=27%, list=12%, signal=24%	NCF1/VAV1/PTPRC/WAS/DOCK2/SCIN/SYK/HCK/INPP5D/PIK3CG/GSN/PLCG2/PIK3R5/PPAP2B/PRKCB/FCGR2B/LYN/RAC2/PPAP2A/FCGR1A/FCGR3A/PLA2G4A/FCGR2C/MARCKS/LAT
KEGG_ANTIGEN_PROCESSING_AND_PRESENTATION	KEGG_ANTIGEN_PROCESSING_AND_PRESENTATION	KEGG_ANTIGEN_PROCESSING_AND_PRESENTATION	65	0.736796	2.50345	0.00218818	0.0121608	0.00860274	3705	tags=62%, list=13%, signal=54%	HLA-DOB/LTA/CD8B/CD8A/KIR3DL2/KIR3DL1/CTSS/HLA-DMB/CIITA/HLA-DQA1/CD4/CD74/HLA-DQA2/KIR2DS4/HLA-DMA/LGMN/HLA-DPA1/HLA-DPB1/HLA-DOA/KLRC1/HLA-DRA/KLRD1/KIR2DL1/HLA-DRB5/HLA-DRB1/KIR2DL4/HLA-DQB1/HLA-E/KIR2DL3/B2M/HLA-F/HLA-B/HLA-A/HLA-C/TAPBP/PSME1/HLA-G/IFI30/TAP1/KLRC4
KEGG_B_CELL_RECEPTOR_SIGNALING_PATHWAY	KEGG_B_CELL_RECEPTOR_SIGNALING_PATHWAY	KEGG_B_CELL_RECEPTOR_SIGNALING_PATHWAY	72	0.648442	2.24659	0.00218818	0.0121608	0.00860274	2534	tags=33%, list=9%, signal=30%	CD79A/CD19/CR2/CD79B/VAV1/CD22/PTPN6/BTK/CARD11/SYK/INPP5D/PIK3CG/CD72/PIK3AP1/PLCG2/DAPP1/PIK3R5/PRKCB/BLNK/FCGR2B/LYN/RAC2/IFITM1/LILRB3
KEGG_SYSTEMIC_LUPUS_ERYTHEMATOSUS	KEGG_SYSTEMIC_LUPUS_ERYTHEMATOSUS	KEGG_SYSTEMIC_LUPUS_ERYTHEMATOSUS	114	0.525771	1.96345	0.00218818	0.0121608	0.00860274	2830	tags=31%, list=10%, signal=28%	ELANE/C7/CD40LG/CTSG/HLA-DOB/C3/C1QB/C6/C1QA/C9/C1QC/C1R/C1S/C4B/HLA-DMB/CD40/HLA-DQA1/C4A/HLA-DQA2/HLA-DMA/HLA-DPA1/HLA-DPB1/HLA-DOA/HLA-DRA/IFNG/HLA-DRB5/HLA-DRB1/HLA-DQB1/CD86/CD28/FCGR2B/C2/FCGR1A/FCGR3A/TNF
KEGG_T_CELL_RECEPTOR_SIGNALING_PATHWAY	KEGG_T_CELL_RECEPTOR_SIGNALING_PATHWAY	KEGG_T_CELL_RECEPTOR_SIGNALING_PATHWAY	103	0.577465	2.09886	0.0021978	0.0121608	0.00860274	3124	tags=30%, list=11%, signal=27%	CD40LG/CD3E/CD3D/CD3G/LCK/GRAP2/ZAP70/CD247/ITK/CD8B/ICOS/VAV1/CD8A/PDCD1/PTPN6/PTPRC/CARD11/LCP2/CD4/PIK3CG/CTLA4/RASGRP1/PIK3R5/IFNG/MAP3K8/CD28/FYN/CDK4/TNF/IL4/NFKBIA
KEGG_INTESTINAL_IMMUNE_NETWORK_FOR_IGA_PRODUCTION	KEGG_INTESTINAL_IMMUNE_NETWORK_FOR_IGA_PRODUCTION	KEGG_INTESTINAL_IMMUNE_NETWORK_FOR_IGA_PRODUCTION	44	0.814002	2.56513	0.00220264	0.0121608	0.00860274	3826	tags=77%, list=13%, signal=67%	TNFRSF17/TNFRSF13B/CD40LG/HLA-DOB/ICOS/ITGB7/PIGR/TNFSF13B/AICDA/HLA-DMB/CD40/HLA-DQA1/HLA-DQA2/HLA-DMA/HLA-DPA1/HLA-DPB1/HLA-DOA/IL15RA/HLA-DRA/HLA-DRB5/HLA-DRB1/IL6/HLA-DQB1/CD86/CCR9/CD28/TNFSF13/IL15/IL4/CXCR4/IL10/CXCL12/MADCAM1/CD80
KEGG_NATURAL_KILLER_CELL_MEDIATED_CYTOTOXICITY	KEGG_NATURAL_KILLER_CELL_MEDIATED_CYTOTOXICITY	KEGG_NATURAL_KILLER_CELL_MEDIATED_CYTOTOXICITY	113	0.641417	2.38628	0.00220751	0.0121608	0.00860274	3443	tags=44%, list=12%, signal=39%	SH2D1A/NCR3/LCK/CD48/ZAP70/FASLG/CD247/ITGAL/SH2D1B/NCR1/VAV1/KIR3DL2/HCST/KIR3DL1/PTPN6/KLRK1/LCP2/ITGB2/SYK/PRF1/PIK3CG/KIR2DS4/PLCG2/FCER1G/KLRC1/KLRD1/KIR2DL1/PIK3R5/ICAM2/IFNG/CD244/TYROBP/KIR2DL4/PRKCB/PTK2B/HLA-E/RAC2/KIR2DL3/HLA-B/TNFSF10/FYN/FCGR3A/TNF/IFNGR1/RAET1E/ICAM1/HLA-A/HLA-C/HLA-G/LAT
KEGG_NOD_LIKE_RECEPTOR_SIGNALING_PATHWAY	KEGG_NOD_LIKE_RECEPTOR_SIGNALING_PATHWAY	KEGG_NOD_LIKE_RECEPTOR_SIGNALING_PATHWAY	59	0.65525	2.19596	0.00220751	0.0121608	0.00860274	3124	tags=39%, list=11%, signal=35%	CCL5/IL18/CCL8/CXCL1/BIRC3/CCL2/CASP1/CXCL2/PSTPIP1/NLRP3/NAIP/NLRC4/CCL13/CASP5/IL6/CARD6/NOD1/CARD9/MEFV/CCL11/PYCARD/TNF/NFKBIA
KEGG_PPAR_SIGNALING_PATHWAY	KEGG_PPAR_SIGNALING_PATHWAY	KEGG_PPAR_SIGNALING_PATHWAY	60	0.558387	1.8763	0.00220751	0.0121608	0.00860274	5067	tags=40%, list=17%, signal=33%	FABP4/AQP7/CD36/PLIN1/PLTP/SLC27A2/ACSL6/RXRG/FABP3/ACSL5/CYP7A1/FABP7/NR1H3/PPARG/CYP8B1/ANGPTL4/ACOX2/CYP4A11/LPL/ME1/ACSL1/SLC27A1/SORBS1/PCK1
KEGG_FATTY_ACID_METABOLISM	KEGG_FATTY_ACID_METABOLISM	KEGG_FATTY_ACID_METABOLISM	40	0.639015	1.98084	0.00221729	0.0121608	0.00860274	980	tags=15%, list=3%, signal=15%	ADH1B/ADH1C/ADH1A/ADH4/ACSL6/ACSL5
KEGG_METABOLISM_OF_XENOBIOTICS_BY_CYTOCHROME_P450	KEGG_METABOLISM_OF_XENOBIOTICS_BY_CYTOCHROME_P450	KEGG_METABOLISM_OF_XENOBIOTICS_BY_CYTOCHROME_P450	43	0.575832	1.8044	0.00222222	0.0121608	0.00860274	3995	tags=35%, list=14%, signal=30%	ADH1B/ADH1C/ADH1A/CYP2C18/ADH4/ALDH1A3/ALDH3A1/GSTM5/MGST1/AKR1C2/CYP2C9/ALDH3B1/CYP3A43/MGST2/AKR1C3
KEGG_DRUG_METABOLISM_CYTOCHROME_P450	KEGG_DRUG_METABOLISM_CYTOCHROME_P450	KEGG_DRUG_METABOLISM_CYTOCHROME_P450	45	0.594974	1.87267	0.00222717	0.0121608	0.00860274	3175	tags=36%, list=11%, signal=32%	ADH1B/ADH1C/AOX1/ADH1A/CYP2C18/FMO2/ADH4/ALDH1A3/ALDH3A1/GSTM5/MAOA/FMO4/MGST1/CYP2C9/MAOB/ALDH3B1
KEGG_CYTOSOLIC_DNA_SENSING_PATHWAY	KEGG_CYTOSOLIC_DNA_SENSING_PATHWAY	KEGG_CYTOSOLIC_DNA_SENSING_PATHWAY	41	0.649572	2.01611	0.00223214	0.0121608	0.00860274	5695	tags=49%, list=20%, signal=39%	ZBP1/CXCL10/CCL5/IL18/CASP1/CCL4/CCL4L1/IL6/RIPK3/IL33/IRF7/PYCARD/NFKBIA/TMEM173/DDX58/IKBKE/IL1B/POLR3GL/NFKB1/IKBKB
KEGG_COMPLEMENT_AND_COAGULATION_CASCADES	KEGG_COMPLEMENT_AND_COAGULATION_CASCADES	KEGG_COMPLEMENT_AND_COAGULATION_CASCADES	61	0.721927	2.41518	0.00224215	0.0121608	0.00860274	2951	tags=59%, list=10%, signal=53%	C4BPB/CFD/CR2/C7/C4BPA/F10/C3/CR1/C1QB/C6/CFB/C1QA/F13A1/C9/C1QC/C1R/C1S/SERPING1/PROS1/C4B/MASP1/C4A/BDKRB1/TFPI/C3AR1/SERPINF2/BDKRB2/SERPINA1/VWF/SERPINA5/F7/C2/F8/CD55/A2M/THBD
KEGG_CELL_ADHESION_MOLECULES_CAMS	KEGG_CELL_ADHESION_MOLECULES_CAMS	KEGG_CELL_ADHESION_MOLECULES_CAMS	127	0.570643	2.1572	0.00226244	0.0121608	0.00860274	3874	tags=51%, list=13%, signal=45%	CD40LG/SELL/ICAM3/HLA-DOB/CD2/ITGAL/CD8B/SIGLEC1/ICOS/CD8A/PDCD1/ITGB7/CD6/CD22/NEGR1/PTPRC/CADM3/MPZ/SPN/HLA-DMB/CD40/SELP/ITGB2/HLA-DQA1/CD4/CD34/HLA-DQA2/CTLA4/HLA-DMA/HLA-DPA1/HLA-DPB1/HLA-DOA/HLA-DRA/ICAM2/ITGAM/HLA-DRB5/SELPLG/HLA-DRB1/SELE/NFASC/HLA-DQB1/CD86/CD28/HLA-E/CLDN11/HLA-F/HLA-B/CD226/PECAM1/MAG/CDH5/CLDN23/NLGN1/CLDN5/ICAM1/HLA-A/SDC3/HLA-C/HLA-G/ITGA9/CLDN18/ITGA6/MADCAM1/CD80/…
KEGG_CYTOKINE_CYTOKINE_RECEPTOR_INTERACTION	KEGG_CYTOKINE_CYTOKINE_RECEPTOR_INTERACTION	KEGG_CYTOKINE_CYTOKINE_RECEPTOR_INTERACTION	228	0.616467	2.52545	0.00226757	0.0121608	0.00860274	3273	tags=49%, list=11%, signal=44%	TNFRSF17/TNFRSF13B/FIGF/CCL17/CCR7/LTB/CCR6/CD40LG/CCL19/CCL22/CXCL9/CXCL11/CXCL10/CXCR5/IL12B/CCR4/CXCL13/CD27/XCR1/IL12RB2/IL2RA/LTA/CXCR3/IL5RA/IL2RG/FASLG/CCL5/CCR8/IL18/CXCR6/FLT3/IL10RA/CCR2/CCL14/XCL2/CCL8/IL24/TNFSF14/CXCL1/TNFSF13B/CCR5/IL18RAP/IL2RB/IL12RB1/CCL16/TNFSF18/XCL1/TNFRSF1B/CCL24/CCL23/CSF2RB/ACVRL1/CCL2/CSF3R/CSF1R/CD40/TNFSF8/CXCL2/CCL4/CCL3/IL13/LEP/IL20RA/IL7/IL15RA/IL20R…
KEGG_CHEMOKINE_SIGNALING_PATHWAY	KEGG_CHEMOKINE_SIGNALING_PATHWAY	KEGG_CHEMOKINE_SIGNALING_PATHWAY	180	0.629653	2.52026	0.0022779	0.0121608	0.00860274	3413	tags=39%, list=12%, signal=35%	CCL17/CCR7/CCR6/CCL19/CCL22/CXCL9/CXCL11/CXCL10/CXCR5/CCR4/CXCL13/XCR1/CXCR3/NCF1/CCL5/CCR8/CXCR6/ITK/CCR2/CCL14/XCL2/CCL8/VAV1/CXCL1/CCR5/CCL16/XCL1/WAS/CCL24/CCL23/DOCK2/CCL2/CXCL2/CCL4/HCK/CCL3/PIK3CG/PLCB2/GRK5/FGR/PIK3R5/CCL13/CCL18/CX3CL1/CCL4L1/JAK3/CXCL6/RASGRP2/CCL21/PRKCB/PTK2B/ARRB1/CCR9/CCL3L3/GNGT2/LYN/RAC2/CXCL16/STAT1/ELMO1/CXCR2/CCR1/ARRB2/CCL11/ADCY5/PXN/CXCR4/NFKBIA/PREX1/GNG11/…
KEGG_ARACHIDONIC_ACID_METABOLISM	KEGG_ARACHIDONIC_ACID_METABOLISM	KEGG_ARACHIDONIC_ACID_METABOLISM	47	0.644308	2.03309	0.00228833	0.0121608	0.00860274	4044	tags=49%, list=14%, signal=42%	PLA2G2D/PLA2G2A/CYP2C18/GPX3/HPGDS/PTGDS/ALOX15B/PTGIS/ALOX5/PTGS1/GGT5/PTGES/GPX2/TBXAS1/LTC4S/PLA2G5/PLA2G4A/GGT1/CYP2C9/CYP2U1/CYP4A11/AKR1C3/CYP4F3
KEGG_BASAL_CELL_CARCINOMA	KEGG_BASAL_CELL_CARCINOMA	KEGG_BASAL_CELL_CARCINOMA	54	-0.524611	-1.71265	0.00362319	0.0187198	0.0132426	3243	tags=33%, list=11%, signal=30%	FZD5/WNT6/WNT9A/FZD1/GLI1/FZD2/LEF1/FZD8/PTCH1/FZD3/WNT5A/WNT5B/BMP2/WNT16/FZD10/HHIP/WNT7B
KEGG_VASCULAR_SMOOTH_MUSCLE_CONTRACTION	KEGG_VASCULAR_SMOOTH_MUSCLE_CONTRACTION	KEGG_VASCULAR_SMOOTH_MUSCLE_CONTRACTION	105	0.456792	1.66588	0.00441501	0.0221481	0.0156679	5853	tags=37%, list=20%, signal=30%	PLA2G2D/PLA2G2A/KCNMB4/ADRA1A/NPR1/PLCB2/PRKCB/MRVI1/PLA2G5/RAMP3/CACNA1S/ADCY5/RAMP2/PLA2G4A/MYH11/PRKCH/PTGIR/MYL9/ADRA1B/ACTG2/CYP4A11/PRKCD/GUCY1B3/ADCY2/PLCB1/PLCB4/PLA2G2C/ADORA2A/MAPK3/KCNMB1/PRKG1/ADCY7/ROCK1/ADCY4/MYL6/CACNA1F/ADCY3/CALCRL/GNA11
KEGG_JAK_STAT_SIGNALING_PATHWAY	KEGG_JAK_STAT_SIGNALING_PATHWAY	KEGG_JAK_STAT_SIGNALING_PATHWAY	127	0.449494	1.69922	0.00452489	0.0221481	0.0156679	4421	tags=39%, list=15%, signal=33%	IL12B/IL12RB2/IL2RA/IL5RA/IL2RG/IL10RA/IL24/IL2RB/IL12RB1/PTPN6/CSF2RB/CSF3R/STAT4/PIK3CG/IL13/LEP/IL20RA/IL7/IL15RA/PIK3R5/IL20RB/IFNG/CSF2RA/JAK3/SPRY1/IL6/IL21R/IL7R/IL15/STAT1/IL6ST/CNTF/IL9R/IFNGR1/IL4/GHR/STAT5A/OSMR/IL3RA/IL6R/IL10/STAT6/CBLB/TPO/OSM/JAK2/SOCS3/EPOR/STAT5B
KEGG_MATURITY_ONSET_DIABETES_OF_THE_YOUNG	KEGG_MATURITY_ONSET_DIABETES_OF_THE_YOUNG	KEGG_MATURITY_ONSET_DIABETES_OF_THE_YOUNG	19	-0.686073	-1.77415	0.00555556	0.0262712	0.0185846	2747	tags=47%, list=9%, signal=43%	NKX2-2/FOXA3/ONECUT1/HNF4G/NKX6-1/MNX1/FOXA2/MAFA
KEGG_RIBOSOME	KEGG_RIBOSOME	KEGG_RIBOSOME	88	-0.449507	-1.58399	0.00564972	0.0262712	0.0185846	14339	tags=86%, list=49%, signal=44%	RPS23/RPL30/RPLP1/RPL7A/RPS29/RPS25/RPS13/RPS16/RPL35/MRPL13/RPS11/RPS15/RPL11/RPS27/RPS28/RPL26L1/RPLP0/RPL9/RPL13A/RPL18A/RPL7/RPS21/RPS9/RPL3/RPS27A/RPL37/RSL24D1P11/RPS19/RPS6/RPS8/RPS10/RPL12/RPS20/RPL38/RPL23A/RPS17/RPL27A/RPL36/RPL15/RPL27/RPL32/RPS3/RPL31/RPL39/RPL13/RPL4/RPL23/RPS18/RPS15A/RPS3A/RPS4X/RPL34/RPL24/RPS2/RPL10A/RPL10L/RPL29/RPL28/RPLP2/RPS24/RPL14/RPL18/RPS7/RPL8/RPS5/RPL5/…
KEGG_ETHER_LIPID_METABOLISM	KEGG_ETHER_LIPID_METABOLISM	KEGG_ETHER_LIPID_METABOLISM	28	0.60495	1.73344	0.00649351	0.0293932	0.0207931	3672	tags=39%, list=13%, signal=34%	PLA2G2D/PLA2G2A/PPAP2B/ENPP2/PLA2G5/CHPT1/PPAP2A/PLA2G4A/PLA2G7/ENPP6/LPCAT2
KEGG_TRYPTOPHAN_METABOLISM	KEGG_TRYPTOPHAN_METABOLISM	KEGG_TRYPTOPHAN_METABOLISM	38	0.548008	1.67068	0.00663717	0.0293932	0.0207931	3514	tags=37%, list=12%, signal=32%	IDO1/AOX1/IDO2/TPH2/INMT/WARS/KMO/ASMT/IL4I1/MAOA/ALDH2/MAOB/AANAT/ALDH3A2
KEGG_AXON_GUIDANCE	KEGG_AXON_GUIDANCE	KEGG_AXON_GUIDANCE	125	-0.408659	-1.53747	0.00724638	0.0307883	0.0217801	5389	tags=32%, list=19%, signal=26%	SEMA6D/SEMA6C/ITGB1/UNC5C/ROBO1/SRGAP3/NFATC4/SEMA5B/NTNG1/EFNA4/EPHB1/EPHB4/UNC5B/EPHB2/SEMA4F/NTN3/RHOD/EPHB3/ROBO2/SEMA4G/SEMA6A/SLIT1/EPHA3/LRRC4C/RGS3/SEMA5A/NTN1/SEMA3A/NGEF/EPHA8/EFNB3/RAC3/SEMA7A/EPHA5/EFNA2/EFNA3/DPYSL5/PAK7/UNC5D
KEGG_CELL_CYCLE	KEGG_CELL_CYCLE	KEGG_CELL_CYCLE	124	-0.406672	-1.52436	0.00736648	0.0307883	0.0217801	8300	tags=44%, list=29%, signal=31%	SFN/CDC7/SMC1A/RAD21/SMC3/ANAPC5/CDC25B/CDKN1C/CDKN2A/BUB3/GADD45G/ORC6/CDK2/MYC/E2F1/MCM6/WEE1/MAD2L2/PTTG1/MCM7/E2F3/CDC6/PRKDC/CDC45/SKP2/MAD2L1/TGFB2/PKMYT1/CCNB3/SMC1B/CCNE1/MCM3/CHEK1/PCNA/CCNA2/MCM4/CDC25C/CDK1/ESPL1/CDC25A/E2F2/TTK/BUB1/CCNE2/ORC1/TFDP1/MCM2/CCNB1/BUB1B/CCNB2/PLK1/CDC20/CCNA1
KEGG_TGF_BETA_SIGNALING_PATHWAY	KEGG_TGF_BETA_SIGNALING_PATHWAY	KEGG_TGF_BETA_SIGNALING_PATHWAY	85	-0.44791	-1.57684	0.00744879	0.0307883	0.0217801	4818	tags=29%, list=17%, signal=25%	LEFTY1/TGFB2/SMAD1/ACVR1C/ACVR2B/THBS4/PITX2/ID4/ID3/SMAD9/TFDP1/AMH/ID1/INHBA/GDF5/BMPR1B/COMP/LEFTY2/INHBE/GDF7/BMP2/AMHR2/NOG/BMP5
KEGG_ALPHA_LINOLENIC_ACID_METABOLISM	KEGG_ALPHA_LINOLENIC_ACID_METABOLISM	KEGG_ALPHA_LINOLENIC_ACID_METABOLISM	14	0.702376	1.71467	0.00852878	0.034486	0.0243958	2758	tags=29%, list=10%, signal=26%	PLA2G2D/PLA2G2A/PLA2G5/PLA2G4A
KEGG_SPLICEOSOME	KEGG_SPLICEOSOME	KEGG_SPLICEOSOME	124	-0.402654	-1.5093	0.0092081	0.0364406	0.0257786	15101	tags=77%, list=52%, signal=37%	PCBP1/LSM5/CCDC12/WBP11/SMNDC1/SRSF4/PPIE/SF3B1/AQR/SF3B5/PRPF18/HNRNPA1L2/HNRNPM/SRSF6/SNRPD3/PRPF40A/PRPF31/THOC3/U2AF1/USP39/SART1/SNRPB2/SRSF3/DHX16/HNRNPC/EIF4A3/HNRNPK/SNRPG/HNRNPA3/SRSF7/SRSF2/CRNKL1/ACIN1/CDC5L/PRPF8/PRPF38A/PUF60/BCAS2/THOC1/DHX8/RBM25/NCBP2/U2AF2/SNRPD2/SNRPA/ISY1/RBM17/SF3B2/SRSF9/TXNL4A/SRSF10/DDX46/LSM7/SNRNP70/HNRNPU/CHERP/SNRNP40/PRPF19/U2SURP/SF3A3/TRA2B/LSM4/MAGO…
KEGG_WNT_SIGNALING_PATHWAY	KEGG_WNT_SIGNALING_PATHWAY	KEGG_WNT_SIGNALING_PATHWAY	142	-0.386264	-1.47214	0.0108108	0.0418919	0.0296349	3353	tags=20%, list=12%, signal=18%	NKD2/PRKCA/FZD9/NKD1/CXXC4/FZD5/PRKCG/WNT6/WNT9A/FZD1/FZD2/MMP7/LEF1/FZD8/VANGL2/SFRP5/FZD3/WNT5A/WNT5B/WNT16/RAC3/SFRP4/CAMK2B/FOSL1/FZD10/WIF1/WNT7B
KEGG_DNA_REPLICATION	KEGG_DNA_REPLICATION	KEGG_DNA_REPLICATION	36	-0.525376	-1.5647	0.0166667	0.0632653	0.0447547	12048	tags=86%, list=42%, signal=50%	RPA2/POLA1/POLE3/RPA3/MCM5/RPA1/RNASEH2C/RNASEH1/PRIM1/RFC1/PRIM2/RFC5/POLD2/POLD3/POLA2/MCM6/RNASEH2A/MCM7/LIG1/POLD1/MCM3/RFC3/PCNA/POLE/FEN1/POLE2/MCM4/DNA2/RFC4/MCM2
KEGG_LEUKOCYTE_TRANSENDOTHELIAL_MIGRATION	KEGG_LEUKOCYTE_TRANSENDOTHELIAL_MIGRATION	KEGG_LEUKOCYTE_TRANSENDOTHELIAL_MIGRATION	110	0.401779	1.48324	0.0197368	0.0734211	0.0519391	3136	tags=28%, list=11%, signal=25%	NCF1/MYLPF/ITGAL/ITK/RHOH/VAV1/CYBB/NCF4/ITGB2/PIK3CG/PLCG2/TXK/PIK3R5/ITGAM/PRKCB/PTK2B/RAPGEF3/RAC2/RASSF5/CLDN11/NCF2/PECAM1/CDH5/CLDN23/CYBA/PXN/CLDN5/CXCR4/ICAM1/MYL9/SIPA1
KEGG_ECM_RECEPTOR_INTERACTION	KEGG_ECM_RECEPTOR_INTERACTION	KEGG_ECM_RECEPTOR_INTERACTION	82	-0.416349	-1.4577	0.0204842	0.074707	0.0528487	5746	tags=38%, list=20%, signal=30%	LAMB3/ITGAV/CHAD/COL5A1/COL5A2/ITGB1/RELN/COL6A3/TNC/COL1A2/LAMA1/AGRN/THBS4/LAMC3/SPP1/ITGB6/COL1A1/FN1/SV2A/ITGA2B/ITGA2/COMP/TNN/SDC1/TNR/ITGA10/COL11A2/IBSP/COL11A1/COL2A1
KEGG_ADIPOCYTOKINE_SIGNALING_PATHWAY	KEGG_ADIPOCYTOKINE_SIGNALING_PATHWAY	KEGG_ADIPOCYTOKINE_SIGNALING_PATHWAY	63	0.466034	1.57735	0.0218341	0.0780988	0.0552481	5911	tags=40%, list=20%, signal=32%	CD36/ACSL6/RXRG/TNFRSF1B/ACSL5/LEP/PPARGC1A/SLC2A4/PRKAG3/TNF/NFKBIA/PRKAA2/POMC/JAK2/TNFRSF1A/SOCS3/TRADD/ACACB/PRKAA1/ACSL1/PCK1/NFKB1/IKBKB/MAPK10/CPT1A
KEGG_ABC_TRANSPORTERS	KEGG_ABC_TRANSPORTERS	KEGG_ABC_TRANSPORTERS	42	0.505541	1.56966	0.0224215	0.0786869	0.0556642	4001	tags=33%, list=14%, signal=29%	ABCA9/ABCA6/ABCA8/ABCC2/ABCA10/ABCB5/ABCC8/ABCA1/ABCD2/ABCG1/ABCG5/CFTR/TAP1/TAP2
KEGG_ALDOSTERONE_REGULATED_SODIUM_REABSORPTION	KEGG_ALDOSTERONE_REGULATED_SODIUM_REABSORPTION	KEGG_ALDOSTERONE_REGULATED_SODIUM_REABSORPTION	39	0.500494	1.5457	0.023913	0.0811905	0.0574353	4818	tags=41%, list=17%, signal=34%	ATP1A4/SCNN1B/ATP1B4/ATP1A2/PIK3CG/PIK3R5/PRKCB/HSD11B1/KCNJ1/SCNN1G/FXYD2/IGF1/SGK1/NR3C2/PIK3CD/MAPK3
KEGG_GLYCOLYSIS_GLUCONEOGENESIS	KEGG_GLYCOLYSIS_GLUCONEOGENESIS	KEGG_GLYCOLYSIS_GLUCONEOGENESIS	54	0.489423	1.60001	0.0244444	0.0811905	0.0574353	3879	tags=26%, list=13%, signal=22%	ADH1B/ADH1C/ADH1A/ADH4/ALDH1A3/HK3/ALDH3A1/LDHC/FBP1/ALDH2/ALDH3B1/ALDH3A2/ACSS1/ACSS2
KEGG_RIG_I_LIKE_RECEPTOR_SIGNALING_PATHWAY	KEGG_RIG_I_LIKE_RECEPTOR_SIGNALING_PATHWAY	KEGG_RIG_I_LIKE_RECEPTOR_SIGNALING_PATHWAY	54	0.47573	1.55524	0.0244444	0.0811905	0.0574353	6016	tags=35%, list=21%, signal=28%	CXCL10/IL12B/CASP10/IFIH1/DHX58/RNF125/IRF7/TNF/NFKBIA/MAP3K1/TMEM173/DDX58/ISG15/TRADD/IKBKE/NFKB1/IKBKB/MAPK10/CYLD
KEGG_CALCIUM_SIGNALING_PATHWAY	KEGG_CALCIUM_SIGNALING_PATHWAY	KEGG_CALCIUM_SIGNALING_PATHWAY	161	-0.343906	-1.33331	0.0300353	0.0965517	0.068302	1754	tags=15%, list=6%, signal=14%	CHRNA7/CHRM2/ERBB4/ADRA1D/SPHK1/RYR2/ADCY8/MYLK2/CACNA1G/TNNC1/GRIN1/HTR7/CAMK2B/ATP2B3/HTR6/SLC8A2/ATP2B2/OXTR/CACNA1E/NOS1/CHRM1/CCKBR/NTSR1
KEGG_APOPTOSIS	KEGG_APOPTOSIS	KEGG_APOPTOSIS	82	0.419075	1.48635	0.0301075	0.0965517	0.068302	4969	tags=27%, list=17%, signal=22%	FASLG/BIRC3/CSF2RB/PIK3CG/NGF/PIK3R5/CASP10/TNFSF10/TNF/CFLAR/NFKBIA/IL3RA/TNFRSF1A/IRAK3/TRADD/MYD88/PIK3CD/PPP3CC/ENDOD1/IL1R1/IL1A/IL1B
KEGG_PHENYLALANINE_METABOLISM	KEGG_PHENYLALANINE_METABOLISM	KEGG_PHENYLALANINE_METABOLISM	17	0.614356	1.56584	0.0386266	0.121772	0.0861432	3175	tags=47%, list=11%, signal=42%	HPD/ALDH1A3/IL4I1/AOC3/ALDH3A1/MAOA/MAOB/ALDH3B1
KEGG_VEGF_SIGNALING_PATHWAY	KEGG_VEGF_SIGNALING_PATHWAY	KEGG_VEGF_SIGNALING_PATHWAY	68	0.422431	1.44721	0.0416667	0.129167	0.0913743	4818	tags=26%, list=17%, signal=22%	PLA2G2D/PLA2G2A/PIK3CG/PLCG2/PIK3R5/SH2D2A/PRKCB/RAC2/PLA2G5/PLA2G4A/PXN/KDR/NFATC2/NOS3/PLA2G2C/PIK3CD/PPP3CC/MAPK3
KEGG_OOCYTE_MEIOSIS	KEGG_OOCYTE_MEIOSIS	KEGG_OOCYTE_MEIOSIS	103	-0.367126	-1.33751	0.0457038	0.139359	0.0985846	5734	tags=26%, list=20%, signal=21%	MAD2L2/PTTG1/FBXO5/MAD2L1/FBXO43/MAPK12/PKMYT1/AR/SMC1B/CCNE1/CDC25C/CDK1/ESPL1/AURKA/BUB1/SGOL1/CCNE2/CCNB1/CCNB2/RPS6KA6/PLK1/IGF1R/PGR/CDC20/ADCY8/CAMK2B
KEGG_LINOLEIC_ACID_METABOLISM	KEGG_LINOLEIC_ACID_METABOLISM	KEGG_LINOLEIC_ACID_METABOLISM	22	0.542414	1.45836	0.0572034	0.17161	0.121399	2814	tags=27%, list=10%, signal=25%	PLA2G2D/PLA2G2A/CYP2C18/PLA2G5/PLA2G4A/CYP2C9
KEGG_LYSOSOME	KEGG_LYSOSOME	KEGG_LYSOSOME	118	0.351367	1.3209	0.0586957	0.173292	0.122589	7461	tags=46%, list=26%, signal=34%	CTSG/CTSE/CTSW/CTSS/LAMP3/FUCA1/LGMN/CTSC/ASAH1/CTSH/TPP1/LAPTM5/MCOLN1/CD68/CD63/CTSO/PLA2G15/LIPA/PSAP/NPC2/GALC/AP1B1/NAGA/ACP2/NAGLU/CTSA/CLTB/SGSH/MAN2B1/GNPTAB/DNASE2/CD164/GBA/CLN5/CTSZ/ARSA/AP3S2/ATP6V0D1/GAA/DNASE2B/AGA/ABCA2/IGF2R/GGA3/HEXA/IDS/NAGPA/NAPSA/AP1S3/HYAL1/M6PR/MANBA/ARSG/SCARB2
KEGG_HISTIDINE_METABOLISM	KEGG_HISTIDINE_METABOLISM	KEGG_HISTIDINE_METABOLISM	27	0.507914	1.44787	0.0636943	0.185111	0.13095	4111	tags=37%, list=14%, signal=32%	ASPA/ALDH1A3/HDC/ALDH3A1/MAOA/ALDH2/MAOB/ALDH3B1/ALDH3A2/HNMT
KEGG_BASE_EXCISION_REPAIR	KEGG_BASE_EXCISION_REPAIR	KEGG_BASE_EXCISION_REPAIR	34	-0.484302	-1.41788	0.0659134	0.188614	0.133428	8346	tags=62%, list=29%, signal=44%	HMGB1/PARP4/XRCC1/APEX1/LIG3/POLD2/POLD3/NEIL3/NTHL1/PARP2/UNG/LIG1/PARP1/POLD1/PCNA/POLE/FEN1/POLE2/TDG/HMGB1P1
KEGG_NICOTINATE_AND_NICOTINAMIDE_METABOLISM	KEGG_NICOTINATE_AND_NICOTINAMIDE_METABOLISM	KEGG_NICOTINATE_AND_NICOTINAMIDE_METABOLISM	22	0.538228	1.44711	0.0677966	0.191063	0.135161	6699	tags=55%, list=23%, signal=42%	AOX1/CD38/NMNAT3/BST1/NAMPT/NMNAT2/NT5E/ENPP3/NT5C1B/NNMT/NADK/NT5C1A
KEGG_RENIN_ANGIOTENSIN_SYSTEM	KEGG_RENIN_ANGIOTENSIN_SYSTEM	KEGG_RENIN_ANGIOTENSIN_SYSTEM	16	0.574975	1.44482	0.0731183	0.202174	0.143021	3056	tags=38%, list=11%, signal=34%	CMA1/CTSG/ACE2/CPA3/MAS1/ACE
KEGG_REGULATION_OF_AUTOPHAGY	KEGG_REGULATION_OF_AUTOPHAGY	KEGG_REGULATION_OF_AUTOPHAGY	20	0.548507	1.44081	0.073913	0.202174	0.143021	8710	tags=55%, list=30%, signal=38%	IFNG/GABARAPL1/PRKAA2/PRKAA1/ATG7/GABARAP/ATG3/ATG4C/ATG12/ATG4A/BECN1
KEGG_MISMATCH_REPAIR	KEGG_MISMATCH_REPAIR	KEGG_MISMATCH_REPAIR	23	-0.502621	-1.37341	0.0864662	0.233083	0.164886	10029	tags=83%, list=35%, signal=54%	RFC2/RPA2/RPA3/RPA1/PMS2/RFC1/RFC5/POLD2/POLD3/MSH3/LIG1/POLD1/RFC3/PCNA/MSH6/MSH2/RFC4/EXO1
KEGG_MELANOGENESIS	KEGG_MELANOGENESIS	KEGG_MELANOGENESIS	96	-0.359627	-1.28814	0.0904059	0.240221	0.169936	3256	tags=19%, list=11%, signal=17%	FZD9/FZD5/PRKCG/WNT6/WNT9A/FZD1/FZD2/LEF1/FZD8/FZD3/WNT5A/WNT5B/ADCY8/WNT16/CAMK2B/FZD10/WNT7B
KEGG_FOCAL_ADHESION	KEGG_FOCAL_ADHESION	KEGG_FOCAL_ADHESION	197	-0.302889	-1.19922	0.0983302	0.257598	0.182228	5756	tags=24%, list=20%, signal=20%	COL4A6/LAMB3/JUN/PIK3R2/VEGFA/MYL10/ITGAV/HRAS/CHAD/COL5A1/BCAR1/COL5A2/ITGB1/PDGFC/SHC3/ACTN1/RELN/COL6A3/TNC/COL1A2/LAMA1/THBS4/PRKCA/LAMC3/SPP1/ACTN3/MYL2/PRKCG/ITGB6/COL1A1/FN1/IGF1R/ITGA2B/ITGA2/VAV3/COMP/TNN/RASGRF1/TNR/MYLK2/RAC3/ITGA10/COL11A2/IBSP/COL11A1/PAK7/COL2A1
KEGG_MTOR_SIGNALING_PATHWAY	KEGG_MTOR_SIGNALING_PATHWAY	KEGG_MTOR_SIGNALING_PATHWAY	50	0.407515	1.30867	0.105856	0.273461	0.19345	6344	tags=30%, list=22%, signal=23%	FIGF/PIK3CG/PIK3R5/CAB39L/RPS6KA1/IGF1/PRKAA2/PRKAA1/PIK3CD/MAPK3/RPTOR/CAB39/RPS6KA2/DDIT4/VEGFC
KEGG_GLYCEROPHOSPHOLIPID_METABOLISM	KEGG_GLYCEROPHOSPHOLIPID_METABOLISM	KEGG_GLYCEROPHOSPHOLIPID_METABOLISM	70	0.363662	1.25583	0.116129	0.292739	0.207088	4925	tags=23%, list=17%, signal=19%	PLA2G2D/PLA2G2A/PPAP2B/PLA2G5/CHPT1/PPAP2A/ACHE/PLA2G4A/LPCAT2/PLA2G15/GPD1L/DGKG/GPD1/PLA2G2C/DGKA/AGPAT9
KEGG_HOMOLOGOUS_RECOMBINATION	KEGG_HOMOLOGOUS_RECOMBINATION	KEGG_HOMOLOGOUS_RECOMBINATION	28	-0.470772	-1.33436	0.116667	0.292739	0.207088	13294	tags=86%, list=46%, signal=46%	MUS81/RAD51/SSBP1/NBN/RPA2/RAD51D/TOP3A/RPA3/RPA1/MRE11A/RAD52/BRCA2/TOP3B/POLD2/POLD3/XRCC3/RAD51B/BLM/EME1/POLD1/RAD54B/XRCC2/RAD54L
KEGG_ACUTE_MYELOID_LEUKEMIA	KEGG_ACUTE_MYELOID_LEUKEMIA	KEGG_ACUTE_MYELOID_LEUKEMIA	57	0.386565	1.27958	0.11804	0.292739	0.207088	6278	tags=30%, list=22%, signal=23%	FLT3/PIM2/PIK3CG/PIK3R5/SPI1/CEBPA/ZBTB16/STAT5A/STAT5B/KIT/PIK3CD/MAPK3/NFKB1/GRB2/IKBKB/PML/STAT3
KEGG_GLYCOSAMINOGLYCAN_BIOSYNTHESIS_HEPARAN_SULFATE	KEGG_GLYCOSAMINOGLYCAN_BIOSYNTHESIS_HEPARAN_SULFATE	KEGG_GLYCOSAMINOGLYCAN_BIOSYNTHESIS_HEPARAN_SULFATE	25	-0.470722	-1.29592	0.131429	0.321654	0.227543	4461	tags=44%, list=15%, signal=37%	HS3ST1/EXTL2/B3GAT2/XYLT1/B3GAT1/HS3ST5/HS3ST3B1/HS6ST3/NDST3/HS3ST3A1
KEGG_LONG_TERM_POTENTIATION	KEGG_LONG_TERM_POTENTIATION	KEGG_LONG_TERM_POTENTIATION	63	-0.37611	-1.25867	0.134191	0.32415	0.229308	3256	tags=14%, list=11%, signal=13%	PRKCG/GRIA1/RPS6KA6/ADCY8/GRIN1/CAMK2B/PPP1R1A/GRIA2
KEGG_GNRH_SIGNALING_PATHWAY	KEGG_GNRH_SIGNALING_PATHWAY	KEGG_GNRH_SIGNALING_PATHWAY	91	0.341123	1.23084	0.138593	0.327723	0.231836	5853	tags=27%, list=20%, signal=22%	PLA2G2D/PLA2G2A/PLCB2/PRKCB/PTK2B/HBEGF/PLA2G5/CACNA1S/ADCY5/PLA2G4A/MAP3K1/PRKCD/ADCY2/PLCB1/PLCB4/PLA2G2C/MAPK3/ADCY7/ADCY4/GRB2/EGFR/CACNA1F/MAPK10/ADCY3/GNA11
KEGG_CARDIAC_MUSCLE_CONTRACTION	KEGG_CARDIAC_MUSCLE_CONTRACTION	KEGG_CARDIAC_MUSCLE_CONTRACTION	68	-0.369578	-1.25855	0.139194	0.327723	0.231836	3655	tags=21%, list=13%, signal=18%	CACNA1D/MYL2/CACNG4/ATP1A3/CACNA2D2/ATP1B1/ACTC1/COX6B2/RYR2/TNNC1/CACNG7/TNNI3/TNNT2
KEGG_NITROGEN_METABOLISM	KEGG_NITROGEN_METABOLISM	KEGG_NITROGEN_METABOLISM	23	-0.473942	-1.29504	0.144737	0.336513	0.238054	3792	tags=39%, list=13%, signal=34%	CA3/CA12/CA5A/CTH/CA1/CA7/CA2/CA9
KEGG_AMYOTROPHIC_LATERAL_SCLEROSIS_ALS	KEGG_AMYOTROPHIC_LATERAL_SCLEROSIS_ALS	KEGG_AMYOTROPHIC_LATERAL_SCLEROSIS_ALS	50	-0.38912	-1.25351	0.155914	0.358025	0.253272	2836	tags=14%, list=10%, signal=13%	NEFL/NEFM/NEFH/GRIN1/NOS1/GRIA2
KEGG_PANCREATIC_CANCER	KEGG_PANCREATIC_CANCER	KEGG_PANCREATIC_CANCER	70	0.351605	1.21419	0.165591	0.372788	0.263715	6344	tags=29%, list=22%, signal=22%	FIGF/TGFA/PIK3CG/PIK3R5/RAC2/STAT1/TGFBR2/CDK4/SMAD3/RB1/PIK3CD/MAPK3/ARHGEF6/NFKB1/EGFR/IKBKB/MAPK10/JAK1/STAT3/VEGFC
KEGG_TASTE_TRANSDUCTION	KEGG_TASTE_TRANSDUCTION	KEGG_TASTE_TRANSDUCTION	32	-0.438025	-1.27072	0.166352	0.372788	0.263715	3099	tags=41%, list=11%, signal=36%	GNAS/TAS2R10/TAS2R19/CACNA1B/GNB3/GNG3/TRPM5/TAS2R43/TAS1R1/ADCY8/GNG13/GRM4
KEGG_VASOPRESSIN_REGULATED_WATER_REABSORPTION	KEGG_VASOPRESSIN_REGULATED_WATER_REABSORPTION	KEGG_VASOPRESSIN_REGULATED_WATER_REABSORPTION	41	0.406338	1.26117	0.171875	0.38058	0.269228	9591	tags=54%, list=33%, signal=36%	AQP3/ARHGDIB/AVPR2/CREB5/CREB3L3/DYNC1I1/DCTN6/RAB5B/ADCY3/RAB5C/STX4/DYNLL2/DYNC1LI2/RAB11B/ADCY9/PRKACA/PRKACB/DYNC2H1/DCTN2/PRKX/AQP4/RAB11A
KEGG_MAPK_SIGNALING_PATHWAY	KEGG_MAPK_SIGNALING_PATHWAY	KEGG_MAPK_SIGNALING_PATHWAY	247	0.267461	1.10847	0.189931	0.415614	0.294011	5830	tags=29%, list=20%, signal=23%	PLA2G2D/PLA2G2A/FASLG/MAP4K1/PTPN7/CD14/FGF7/CACNB4/RASGRP4/NGF/RASGRP1/CACNA1I/FGF16/MAP3K8/RASGRP2/FGF18/PRKCB/ARRB1/FGF9/RAC2/NR4A1/DUSP1/PLA2G5/GADD45B/TGFBR2/RPS6KA1/FGF10/CACNA1S/ARRB2/MAP3K5/CACNG6/PLA2G4A/MAPT/TNF/FGF2/RRAS/PDGFB/MAP3K1/MKNK1/RASGRP3/CACNA2D3/NFATC2/CACNB2/TNFRSF1A/FGF20/MKNK2/RRAS2/RAP1A/RAP1B/PLA2G2C/MAX/PPP3CC/FGF13/MAPK3/FGF17/IL1R1/IL1A/IL1B/RELB/MAP3K11/NFKB1/FGF14/…
KEGG_PROTEASOME	KEGG_PROTEASOME	KEGG_PROTEASOME	42	0.395259	1.22724	0.197309	0.426739	0.301881	3421	tags=14%, list=12%, signal=13%	PSMA8/IFNG/PSMB10/PSMB9/PSMB8/PSME1
KEGG_BASAL_TRANSCRIPTION_FACTORS	KEGG_BASAL_TRANSCRIPTION_FACTORS	KEGG_BASAL_TRANSCRIPTION_FACTORS	33	-0.41589	-1.21093	0.208015	0.444722	0.314603	16027	tags=79%, list=55%, signal=35%	TAF7/TAF9B/GTF2B/TAF5L/TAF4/TAF1/TBP/TAF12/GTF2A1/GTF2H1/TAF6L/TAF13/TAF1L/TAF5/GTF2E1/TAF6/TAF11/GTF2H3/TAF4B/GTF2F2/GTF2H4/TAF2/GTF2I/GTF2IRD1/TAF7L
KEGG_PEROXISOME	KEGG_PEROXISOME	KEGG_PEROXISOME	77	0.329698	1.16142	0.217759	0.460263	0.325597	6320	tags=30%, list=22%, signal=23%	SLC27A2/ACSL6/HAO2/ACSL5/SOD2/DAO/ABCD2/ACOX2/MPV17L/PEX11A/IDH1/GSTK1/ACSL1/ECH1/PEX11G/CAT/MLYCD/PIPOX/CRAT/ABCD4/ACAA1/PAOX/EPHX2
KEGG_INSULIN_SIGNALING_PATHWAY	KEGG_INSULIN_SIGNALING_PATHWAY	KEGG_INSULIN_SIGNALING_PATHWAY	128	0.293905	1.11542	0.220982	0.461828	0.326703	5793	tags=25%, list=20%, signal=20%	PHKG1/LIPE/INPP5D/PIK3CG/PYGM/PIK3R5/PPARGC1A/HK3/SLC2A4/FBP1/PRKAG3/RHOQ/SREBF1/MKNK1/PRKAA2/TRIP10/CBLB/PPP1R3B/SOCS3/ACACB/MKNK2/PRKAA1/PIK3CD/MAPK3/SORBS1/PCK1/PHKB/PDE3B/GRB2/IKBKB/RPTOR/MAPK10
KEGG_NUCLEOTIDE_EXCISION_REPAIR	KEGG_NUCLEOTIDE_EXCISION_REPAIR	KEGG_NUCLEOTIDE_EXCISION_REPAIR	44	-0.384164	-1.20465	0.224453	0.463297	0.327742	14175	tags=68%, list=49%, signal=35%	ERCC1/RPA4/POLE4/CUL4B/GTF2H1/ERCC4/RFC2/RPA2/POLE3/DDB1/RPA3/ERCC8/RPA1/CUL4A/GTF2H3/RFC1/RFC5/POLD2/GTF2H4/POLD3/MNAT1/LIG1/ERCC2/POLD1/RFC3/PCNA/POLE/POLE2/RFC4
KEGG_NON_SMALL_CELL_LUNG_CANCER	KEGG_NON_SMALL_CELL_LUNG_CANCER	KEGG_NON_SMALL_CELL_LUNG_CANCER	54	0.357017	1.16715	0.226667	0.463297	0.327742	3081	tags=17%, list=11%, signal=15%	RXRG/TGFA/PIK3CG/PLCG2/PIK3R5/PRKCB/RASSF5/CDK4/RB1
KEGG_TIGHT_JUNCTION	KEGG_TIGHT_JUNCTION	KEGG_TIGHT_JUNCTION	124	-0.299558	-1.12286	0.230203	0.46541	0.329237	6136	tags=29%, list=21%, signal=23%	NRAS/CTNNB1/CLDN1/MYL10/HRAS/PRKCZ/PPP2R2C/PRKCI/PARD6B/YES1/MLLT4/MYH15/PARD3/ACTN1/MAGI3/CRB3/CLDN20/PRKCA/ACTN3/MYL2/PRKCG/CLDN6/PARD6G/MYH3/MYH10/CLDN7/CTNNA3/MYH8/MYH4/CLDN10/CGN/CLDN3/CLDN14/CLDN9/RAB3B
KEGG_VALINE_LEUCINE_AND_ISOLEUCINE_DEGRADATION	KEGG_VALINE_LEUCINE_AND_ISOLEUCINE_DEGRADATION	KEGG_VALINE_LEUCINE_AND_ISOLEUCINE_DEGRADATION	44	0.366972	1.15642	0.235683	0.471366	0.333451	7392	tags=32%, list=26%, signal=24%	AOX1/IL4I1/ALDH2/ACADS/ALDH3A2/AUH/ACAT1/HIBADH/ALDH1B1/ACAA1/ALDH9A1/HADHB/ACADSB/ACAA2
KEGG_ARRHYTHMOGENIC_RIGHT_VENTRICULAR_CARDIOMYOPATHY_ARVC	KEGG_ARRHYTHMOGENIC_RIGHT_VENTRICULAR_CARDIOMYOPATHY_ARVC	KEGG_ARRHYTHMOGENIC_RIGHT_VENTRICULAR_CARDIOMYOPATHY_ARVC	71	-0.329501	-1.13439	0.245902	0.486571	0.344207	5828	tags=34%, list=20%, signal=27%	CACNG8/CTNNB1/ITGAV/CACNB3/ITGB1/LMNA/ACTN1/CACNA1D/ACTN3/CACNG4/ITGB6/DSP/CACNA2D2/GJA1/LEF1/CTNNA3/ITGA2B/ITGA2/DSG2/RYR2/CACNG7/CDH2/ITGA10
KEGG_PROGESTERONE_MEDIATED_OOCYTE_MATURATION	KEGG_PROGESTERONE_MEDIATED_OOCYTE_MATURATION	KEGG_PROGESTERONE_MEDIATED_OOCYTE_MATURATION	82	-0.318694	-1.11579	0.271881	0.529529	0.374596	7619	tags=33%, list=26%, signal=24%	ANAPC5/CDC25B/HSP90AB1/CDK2/MAPK11/SPDYA/MAD2L2/PIK3R2/PDE3A/MAD2L1/MAPK12/PKMYT1/CCNB3/CCNA2/CDC25C/CDK1/CDC25A/BUB1/CCNB1/CCNB2/RPS6KA6/PLK1/IGF1R/PGR/CCNA1/ADCY8
KEGG_PRIMARY_BILE_ACID_BIOSYNTHESIS	KEGG_PRIMARY_BILE_ACID_BIOSYNTHESIS	KEGG_PRIMARY_BILE_ACID_BIOSYNTHESIS	15	0.475835	1.17437	0.273305	0.529529	0.374596	7078	tags=60%, list=24%, signal=45%	CYP7A1/CYP8B1/HSD3B7/ACOX2/CYP27A1/CYP39A1/CYP7B1/SCP2/HSD17B4
KEGG_REGULATION_OF_ACTIN_CYTOSKELETON	KEGG_REGULATION_OF_ACTIN_CYTOSKELETON	KEGG_REGULATION_OF_ACTIN_CYTOSKELETON	201	0.262284	1.06283	0.279642	0.534806	0.378329	3170	tags=17%, list=11%, signal=15%	ITGAD/MYLPF/ITGAL/VAV1/ITGB7/FGD3/WAS/CD14/SCIN/FGF7/ITGB2/NCKAP1L/BDKRB1/PIK3CG/GSN/PIK3R5/FGF16/ITGB4/ITGAM/BDKRB2/FGF18/PDGFD/FGF9/RAC2/CYFIP2/FGF10/ITGA1/PXN/FGF2/RRAS/TMSB4Y/PDGFB/MYL9/ITGAX
KEGG_PROXIMAL_TUBULE_BICARBONATE_RECLAMATION	KEGG_PROXIMAL_TUBULE_BICARBONATE_RECLAMATION	KEGG_PROXIMAL_TUBULE_BICARBONATE_RECLAMATION	22	0.435707	1.17147	0.28178	0.534806	0.378329	3555	tags=36%, list=12%, signal=32%	ATP1A4/CA4/ATP1B4/ATP1A2/AQP1/SLC4A4/FXYD2/GLUD2
KEGG_GLYCOSAMINOGLYCAN_DEGRADATION	KEGG_GLYCOSAMINOGLYCAN_DEGRADATION	KEGG_GLYCOSAMINOGLYCAN_DEGRADATION	19	-0.440453	-1.13899	0.290741	0.544968	0.385518	1472	tags=37%, list=5%, signal=35%	GUSB/GALNS/HPSE2/HYAL3/HS3ST3B1/HS3ST3A1
KEGG_STEROID_HORMONE_BIOSYNTHESIS	KEGG_STEROID_HORMONE_BIOSYNTHESIS	KEGG_STEROID_HORMONE_BIOSYNTHESIS	34	0.38194	1.12861	0.292994	0.544968	0.385518	5120	tags=38%, list=18%, signal=32%	HSD17B2/CYP7A1/HSD17B3/HSD11B1/STS/AKR1C2/CYP11A1/CYP21A2/CYP3A43/AKR1C3/HSD17B6/AKR1C1/HSD3B2
KEGG_EPITHELIAL_CELL_SIGNALING_IN_HELICOBACTER_PYLORI_INFECTION	KEGG_EPITHELIAL_CELL_SIGNALING_IN_HELICOBACTER_PYLORI_INFECTION	KEGG_EPITHELIAL_CELL_SIGNALING_IN_HELICOBACTER_PYLORI_INFECTION	66	0.319	1.08884	0.310044	0.561588	0.397275	3124	tags=15%, list=11%, signal=14%	PTPRZ1/CCL5/CXCL1/PLCG2/LYN/NOD1/HBEGF/CXCR2/IGSF5/NFKBIA
KEGG_VALINE_LEUCINE_AND_ISOLEUCINE_BIOSYNTHESIS	KEGG_VALINE_LEUCINE_AND_ISOLEUCINE_BIOSYNTHESIS	KEGG_VALINE_LEUCINE_AND_ISOLEUCINE_BIOSYNTHESIS	10	-0.526209	-1.17874	0.31028	0.561588	0.397275	13732	tags=100%, list=47%, signal=53%	IARS2/PDHA1/LARS/LARS2/BCAT1/VARS/IARS/BCAT2/VARS2
KEGG_DILATED_CARDIOMYOPATHY	KEGG_DILATED_CARDIOMYOPATHY	KEGG_DILATED_CARDIOMYOPATHY	85	-0.307287	-1.08179	0.310987	0.561588	0.397275	3560	tags=19%, list=12%, signal=17%	TTN/MYL2/CACNG4/ITGB6/CACNA2D2/ACTC1/ITGA2B/ITGA2/RYR2/ADCY8/TNNC1/CACNG7/ITGA10/TNNI3/TNNT2
KEGG_OXIDATIVE_PHOSPHORYLATION	KEGG_OXIDATIVE_PHOSPHORYLATION	KEGG_OXIDATIVE_PHOSPHORYLATION	114	-0.286838	-1.05795	0.324771	0.58084	0.410894	13923	tags=46%, list=48%, signal=24%	COX10/COX11/NDUFB8/COX6A1/CYC1/COX6C/COX5A/UQCRB/NDUFA3/NDUFB9/NDUFS3/ATP5O/UQCRFS1/NDUFV2/COX5B/NDUFB4/ATP5E/NDUFS2/NDUFV1/NDUFC2/NDUFAB1/ATP5B/NDUFB10/NDUFA10/NDUFA11/ATP6V1D/COX8C/ATP5G1/ATP5I/COX6B1/ATP5C1/UQCRC1/UQCRHL/NDUFA7/ATP6V1C2/ATP5D/NDUFS8/ATP6V1B1/NDUFS6/ATP6V0B/TCIRG1/ATP6V1G2/UQCRH/ATP6V1A/ATP6V0A4/NDUFS5/COX6A2/ATP12A/ATP4A/COX6B2/NDUFA4L2/ATP6V0D2
KEGG_TYPE_II_DIABETES_MELLITUS	KEGG_TYPE_II_DIABETES_MELLITUS	KEGG_TYPE_II_DIABETES_MELLITUS	41	-0.346065	-1.07005	0.344765	0.610727	0.432037	5619	tags=27%, list=19%, signal=22%	PRKCZ/CACNA1B/KCNJ11/SOCS2/CACNA1D/GCK/HK2/CACNA1G/CACNA1E/MAFA
KEGG_ENDOCYTOSIS	KEGG_ENDOCYTOSIS	KEGG_ENDOCYTOSIS	178	0.257123	1.03076	0.355056	0.622602	0.440437	4035	tags=17%, list=14%, signal=15%	IL2RA/IL2RG/CCR5/IL2RB/ADRB3/CSF1R/ACAP1/DAB2/ARAP2/GRK5/ARRB1/HLA-E/HLA-F/HLA-B/CXCR2/PSD4/ADRB2/ARRB2/CHMP4C/SMURF2/CXCR4/ERBB3/HLA-A/HLA-C/MDM2/WWP1/HLA-G/KDR/SMAP2/CBLB/ARAP1
KEGG_PANTOTHENATE_AND_COA_BIOSYNTHESIS	KEGG_PANTOTHENATE_AND_COA_BIOSYNTHESIS	KEGG_PANTOTHENATE_AND_COA_BIOSYNTHESIS	16	0.441833	1.11026	0.36129	0.622602	0.440437	4751	tags=31%, list=16%, signal=26%	VNN2/DPYS/UPB1/DPYD/ENPP3
KEGG_RNA_DEGRADATION	KEGG_RNA_DEGRADATION	KEGG_RNA_DEGRADATION	56	-0.320752	-1.05762	0.361511	0.622602	0.440437	15895	tags=79%, list=55%, signal=36%	CNOT4/CNOT1/DDX6/CNOT6/EXOSC6/PAPOLG/LSM5/ZCCHC7/HSPA9/PAPOLA/PNPT1/PARN/SKIV2L2/PATL1/EXOSC9/DCP2/EXOSC10/XRN2/MPHOSPH6/SKIV2L/EXOSC7/EXOSC2/DCP1A/TTC37/EXOSC3/EDC4/CNOT10/DIS3/EXOSC5/LSM7/EDC3/CNOT3/LSM4/PAPD7/RQCD1/EXOSC8/LSM2/HSPD1/EXOSC4/NAA38/ENO2/ENO3/ENO1
KEGG_ADHERENS_JUNCTION	KEGG_ADHERENS_JUNCTION	KEGG_ADHERENS_JUNCTION	73	-0.300899	-1.03781	0.369485	0.630498	0.446023	8040	tags=37%, list=28%, signal=27%	PVRL3/SNAI2/MET/ACTG1/CSNK2B/ACTN4/SSX2IP/CTNNA2/BAIAP2/CTNNB1/LMO7/YES1/MLLT4/PARD3/PVRL1/ACTN1/PTPRF/WASF1/WASF3/ACTN3/PVRL4/LEF1/IGF1R/CTNNA3/CDH1/RAC3
KEGG_GLYCEROLIPID_METABOLISM	KEGG_GLYCEROLIPID_METABOLISM	KEGG_GLYCEROLIPID_METABOLISM	44	-0.33478	-1.0498	0.377737	0.638719	0.451839	3045	tags=20%, list=11%, signal=18%	CEL/AGPAT4/DGKI/MBOAT2/PPAP2C/AWAT2/PNPLA3/LIPG
KEGG_TAURINE_AND_HYPOTAURINE_METABOLISM	KEGG_TAURINE_AND_HYPOTAURINE_METABOLISM	KEGG_TAURINE_AND_HYPOTAURINE_METABOLISM	10	-0.481752	-1.07915	0.392523	0.65293	0.461892	822	tags=30%, list=3%, signal=29%	GAD1/GAD2
KEGG_GLYCINE_SERINE_AND_THREONINE_METABOLISM	KEGG_GLYCINE_SERINE_AND_THREONINE_METABOLISM	KEGG_GLYCINE_SERINE_AND_THREONINE_METABOLISM	30	0.360489	1.05284	0.393162	0.65293	0.461892	3018	tags=23%, list=10%, signal=21%	GATM/BHMT/AOC3/MAOA/DAO/DMGDH/MAOB
KEGG_MELANOMA	KEGG_MELANOMA	KEGG_MELANOMA	65	0.299588	1.01793	0.400438	0.659127	0.466276	5477	tags=32%, list=19%, signal=26%	FGF7/PIK3CG/PIK3R5/FGF16/FGF18/PDGFD/FGF9/FGF10/CDK4/FGF2/RB1/PDGFB/MDM2/IGF1/FGF20/PIK3CD/FGF13/MAPK3/FGF17/FGF14/EGFR
KEGG_NON_HOMOLOGOUS_END_JOINING	KEGG_NON_HOMOLOGOUS_END_JOINING	KEGG_NON_HOMOLOGOUS_END_JOINING	12	-0.448427	-1.04828	0.41573	0.668222	0.47271	13554	tags=58%, list=47%, signal=31%	RAD50/POLM/XRCC5/MRE11A/PRKDC/FEN1
KEGG_HYPERTROPHIC_CARDIOMYOPATHY_HCM	KEGG_HYPERTROPHIC_CARDIOMYOPATHY_HCM	KEGG_HYPERTROPHIC_CARDIOMYOPATHY_HCM	79	-0.292494	-1.01791	0.41791	0.668222	0.47271	3560	tags=19%, list=12%, signal=17%	TTN/MYL2/CACNG4/ITGB6/CACNA2D2/ACTC1/ITGA2B/ITGA2/RYR2/TNNC1/CACNG7/ITGA10/TNNI3/TNNT2
KEGG_AMINOACYL_TRNA_BIOSYNTHESIS	KEGG_AMINOACYL_TRNA_BIOSYNTHESIS	KEGG_AMINOACYL_TRNA_BIOSYNTHESIS	41	-0.332926	-1.02942	0.420578	0.668222	0.47271	12419	tags=61%, list=43%, signal=35%	WARS2/DARS/LARS/RARS/EARS2/FARSB/MARS/FARSA/CARS2/EPRS/LARS2/PARS2/QARS/PSTK/AARS2/MARS2/YARS2/VARS/DARS2/IARS/TARS2/YARS/VARS2/SARS2
KEGG_ASCORBATE_AND_ALDARATE_METABOLISM	KEGG_ASCORBATE_AND_ALDARATE_METABOLISM	KEGG_ASCORBATE_AND_ALDARATE_METABOLISM	8	0.485053	1.04083	0.422269	0.668222	0.47271	6478	tags=62%, list=22%, signal=49%	ALDH2/ALDH3A2/ALDH1B1/ALDH9A1/UGDH
KEGG_STEROID_BIOSYNTHESIS	KEGG_STEROID_BIOSYNTHESIS	KEGG_STEROID_BIOSYNTHESIS	16	-0.420266	-1.04881	0.424581	0.668222	0.47271	3701	tags=50%, list=13%, signal=44%	EBP/CYP51A1/DHCR24/CEL/MSMO1/SQLE/DHCR7
KEGG_BIOSYNTHESIS_OF_UNSATURATED_FATTY_ACIDS	KEGG_BIOSYNTHESIS_OF_UNSATURATED_FATTY_ACIDS	KEGG_BIOSYNTHESIS_OF_UNSATURATED_FATTY_ACIDS	22	-0.387472	-1.04542	0.430189	0.668222	0.47271	15124	tags=82%, list=52%, signal=39%	ACOT4/PTPLA/TECR/HSD17B12/SCD/ACOX3/ELOVL6/FADS1/FADS2/SCD5/PECR/PTPLB/ACOT7/YOD1/ACOT2/BAAT/ELOVL2
KEGG_AMINO_SUGAR_AND_NUCLEOTIDE_SUGAR_METABOLISM	KEGG_AMINO_SUGAR_AND_NUCLEOTIDE_SUGAR_METABOLISM	KEGG_AMINO_SUGAR_AND_NUCLEOTIDE_SUGAR_METABOLISM	43	0.322022	1.00907	0.431111	0.668222	0.47271	2166	tags=14%, list=7%, signal=13%	RENBP/NPL/GFPT2/HK3/UAP1/CHIT1
KEGG_FOLATE_BIOSYNTHESIS	KEGG_FOLATE_BIOSYNTHESIS	KEGG_FOLATE_BIOSYNTHESIS	8	0.465026	0.997857	0.462185	0.710466	0.502593	1989	tags=25%, list=7%, signal=23%	GCH1/ALPL
KEGG_TERPENOID_BACKBONE_BIOSYNTHESIS	KEGG_TERPENOID_BACKBONE_BIOSYNTHESIS	KEGG_TERPENOID_BACKBONE_BIOSYNTHESIS	14	-0.42301	-1.01459	0.467167	0.711621	0.503411	11894	tags=57%, list=41%, signal=34%	IDI1/ACAT2/MVD/HMGCS1/HMGCR/MVK/PDSS1
KEGG_PATHWAYS_IN_CANCER	KEGG_PATHWAYS_IN_CANCER	KEGG_PATHWAYS_IN_CANCER	316	-0.238131	-0.995687	0.470588	0.711621	0.503411	3256	tags=13%, list=11%, signal=12%	FZD9/E2F2/LAMC3/MSH2/FZD5/PRKCG/WNT6/WNT9A/BIRC5/FN1/CCNE2/FZD1/GLI1/FZD2/LEF1/IGF1R/EGLN3/CTNNA3/FZD8/NTRK1/ITGA2B/ITGA2/PTCH1/FGF11/FGF8/FZD3/CCNA1/CDH1/WNT5A/WNT5B/BMP2/WNT16/RAC3/FGFR2/SLC2A1/FGF5/FZD10/FGFR3/HHIP/MMP9/WNT7B
KEGG_GLYCOSPHINGOLIPID_BIOSYNTHESIS_GLOBO_SERIES	KEGG_GLYCOSPHINGOLIPID_BIOSYNTHESIS_GLOBO_SERIES	KEGG_GLYCOSPHINGOLIPID_BIOSYNTHESIS_GLOBO_SERIES	14	0.402238	0.981962	0.484009	0.726013	0.513591	5495	tags=36%, list=19%, signal=29%	A4GALT/FUT1/NAGA/GBGT1/FUT9
KEGG_CITRATE_CYCLE_TCA_CYCLE	KEGG_CITRATE_CYCLE_TCA_CYCLE	KEGG_CITRATE_CYCLE_TCA_CYCLE	29	-0.34351	-0.970077	0.50188	0.741318	0.524419	226	tags=7%, list=1%, signal=7%	OGDHL
KEGG_LONG_TERM_DEPRESSION	KEGG_LONG_TERM_DEPRESSION	KEGG_LONG_TERM_DEPRESSION	63	0.284393	0.962564	0.502183	0.741318	0.524419	4818	tags=21%, list=17%, signal=17%	PLA2G2D/PLA2G2A/PLCB2/PRKCB/LYN/PLA2G5/PLA2G4A/IGF1/GUCY1B3/PLCB1/PLCB4/PLA2G2C/MAPK3
KEGG_LYSINE_DEGRADATION	KEGG_LYSINE_DEGRADATION	KEGG_LYSINE_DEGRADATION	44	-0.308384	-0.967025	0.507299	0.742974	0.52559	6603	tags=23%, list=23%, signal=18%	SUV420H2/AADAT/PLOD1/SUV39H2/EHMT2/WHSC1/DOT1L/PLOD2/OGDHL
KEGG_PYRIMIDINE_METABOLISM	KEGG_PYRIMIDINE_METABOLISM	KEGG_PYRIMIDINE_METABOLISM	96	-0.272346	-0.97551	0.51476	0.744275	0.52651	10094	tags=41%, list=35%, signal=27%	NME7/POLR1B/UMPS/POLR2B/POLR2D/ZNRD1/DTYMK/POLR2A/TK1/NME4/PRIM1/PRIM2/POLR1D/POLD2/POLD3/NME2/POLR1A/POLA2/DHODH/POLR1C/POLR1E/NME1-NME2/POLR2H/POLR3A/PNP/TYMS/UPP2/UPP1/POLD1/RRM1/POLE/POLE2/UCK2/NME1/CAD/RRM2/ENTPD8/ENTPD3
KEGG_O_GLYCAN_BIOSYNTHESIS	KEGG_O_GLYCAN_BIOSYNTHESIS	KEGG_O_GLYCAN_BIOSYNTHESIS	25	-0.348417	-0.959206	0.51619	0.744275	0.52651	273	tags=28%, list=1%, signal=28%	GALNT10/GCNT3/GALNT5/GALNTL6/GALNT14/GALNT9
KEGG_PURINE_METABOLISM	KEGG_PURINE_METABOLISM	KEGG_PURINE_METABOLISM	151	-0.251719	-0.966648	0.537071	0.7571	0.535583	8651	tags=33%, list=30%, signal=23%	AK2/NME4/PRIM1/ADK/PRIM2/POLR1D/POLD2/HPRT1/POLD3/NUDT5/NME2/POLR1A/POLA2/POLR1C/PKLR/PAPSS1/POLR1E/AMPD2/GMPS/NME1-NME2/PRUNE/PDE3A/POLR2H/POLR3A/GART/PNP/AK4/ADSS/POLD1/RRM1/POLE/POLE2/IMPDH2/NME1/GDA/PDE4C/PAICS/PPAT/PFAS/FHIT/RRM2/PDE11A/ENPP1/PDE8B/ADCY8/AK5/ENTPD8/ENTPD3/XDH
KEGG_SPHINGOLIPID_METABOLISM	KEGG_SPHINGOLIPID_METABOLISM	KEGG_SPHINGOLIPID_METABOLISM	37	0.314458	0.947223	0.538631	0.7571	0.535583	6625	tags=43%, list=23%, signal=33%	PPAP2B/ASAH1/UGT8/PPAP2A/ACER1/SGMS1/SGPP2/GALC/UGCG/GAL3ST1/ACER2/ACER3/GBA/ARSA/SPTLC2/SMPD3
KEGG_PROPANOATE_METABOLISM	KEGG_PROPANOATE_METABOLISM	KEGG_PROPANOATE_METABOLISM	32	0.316962	0.930997	0.541226	0.7571	0.535583	6295	tags=34%, list=22%, signal=27%	LDHC/ALDH2/ALDH3A2/ACSS1/ACSS2/ACACB/ACAT1/MLYCD/ALDH1B1/ACSS3/ALDH9A1
KEGG_VIBRIO_CHOLERAE_INFECTION	KEGG_VIBRIO_CHOLERAE_INFECTION	KEGG_VIBRIO_CHOLERAE_INFECTION	51	-0.290259	-0.938702	0.541367	0.7571	0.535583	8780	tags=35%, list=30%, signal=25%	ATP6V1C2/ATP6V1B1/SEC61G/ATP6V0B/ACTG1/TCIRG1/PDIA4/ATP6V1G2/SEC61A2/PLCG1/GNAS/ATP6V1A/ATP6V0A4/ERO1L/PRKCA/PRKCG/ATP6V0D2
KEGG_GLYOXYLATE_AND_DICARBOXYLATE_METABOLISM	KEGG_GLYOXYLATE_AND_DICARBOXYLATE_METABOLISM	KEGG_GLYOXYLATE_AND_DICARBOXYLATE_METABOLISM	15	0.37154	0.916966	0.563559	0.780334	0.552019	846	tags=7%, list=3%, signal=6%	HAO2
KEGG_PYRUVATE_METABOLISM	KEGG_PYRUVATE_METABOLISM	KEGG_PYRUVATE_METABOLISM	38	0.308141	0.939408	0.566372	0.780334	0.552019	6884	tags=42%, list=24%, signal=32%	ACOT12/LDHC/ALDH2/LDHD/ALDH3A2/ACSS1/ACSS2/ACACB/ME1/ACAT1/PCK1/ALDH1B1/ALDH9A1/ACYP2/PCK2/HAGH
KEGG_PATHOGENIC_ESCHERICHIA_COLI_INFECTION	KEGG_PATHOGENIC_ESCHERICHIA_COLI_INFECTION	KEGG_PATHOGENIC_ESCHERICHIA_COLI_INFECTION	52	0.280817	0.912505	0.582418	0.792234	0.560437	2373	tags=15%, list=8%, signal=14%	TLR4/TUBB4A/WAS/CD14/HCLS1/LY96/TLR5/FYN
KEGG_CHRONIC_MYELOID_LEUKEMIA	KEGG_CHRONIC_MYELOID_LEUKEMIA	KEGG_CHRONIC_MYELOID_LEUKEMIA	73	0.2676	0.931021	0.587336	0.792234	0.560437	5695	tags=22%, list=20%, signal=18%	PIK3CG/PIK3R5/TGFBR2/CDK4/SMAD3/RB1/STAT5A/NFKBIA/MDM2/CBLB/STAT5B/PIK3CD/MAPK3/NFKB1/GRB2/IKBKB
KEGG_CYSTEINE_AND_METHIONINE_METABOLISM	KEGG_CYSTEINE_AND_METHIONINE_METABOLISM	KEGG_CYSTEINE_AND_METHIONINE_METABOLISM	33	-0.3168	-0.922413	0.587786	0.792234	0.560437	7956	tags=48%, list=27%, signal=35%	MTAP/LDHB/SRM/TRDMT1/DNMT1/LDHAL6A/SDS/AHCY/LDHA/CBS/DNMT3A/LDHAL6B/CTH/TAT/DNMT3B
KEGG_OTHER_GLYCAN_DEGRADATION	KEGG_OTHER_GLYCAN_DEGRADATION	KEGG_OTHER_GLYCAN_DEGRADATION	14	0.365917	0.893295	0.601279	0.80459	0.569178	7415	tags=57%, list=26%, signal=43%	FUCA1/FUCA2/MAN2B1/GBA/AGA/MAN2B2/HEXA/MANBA
KEGG_RIBOFLAVIN_METABOLISM	KEGG_RIBOFLAVIN_METABOLISM	KEGG_RIBOFLAVIN_METABOLISM	15	-0.378227	-0.930934	0.60566	0.804663	0.56923	3024	tags=20%, list=10%, signal=18%	ENPP1/ACP5
KEGG_GLIOMA	KEGG_GLIOMA	KEGG_GLIOMA	63	0.265099	0.89726	0.620087	0.817046	0.577989	3459	tags=16%, list=12%, signal=14%	TGFA/PIK3CG/PLCG2/PIK3R5/PRKCB/CDK4/RB1/PDGFB/MDM2/IGF1
KEGG_PHOSPHATIDYLINOSITOL_SIGNALING_SYSTEM	KEGG_PHOSPHATIDYLINOSITOL_SIGNALING_SYSTEM	KEGG_PHOSPHATIDYLINOSITOL_SIGNALING_SYSTEM	73	0.261402	0.909457	0.624454	0.817046	0.577989	4812	tags=21%, list=17%, signal=17%	INPP5D/PIK3CG/PLCG2/PLCB2/PIK3R5/PRKCB/PIK3C2B/INPP5J/INPP4B/DGKG/PLCB1/PLCB4/DGKA/PIK3CD/PIP4K2C
KEGG_BLADDER_CANCER	KEGG_BLADDER_CANCER	KEGG_BLADDER_CANCER	41	-0.291974	-0.902794	0.628159	0.817046	0.577989	804	tags=24%, list=3%, signal=24%	E2F1/NRAS/VEGFA/HRAS/E2F3/E2F2/CDH1/FGFR3/MMP9
KEGG_PORPHYRIN_AND_CHLOROPHYLL_METABOLISM	KEGG_PORPHYRIN_AND_CHLOROPHYLL_METABOLISM	KEGG_PORPHYRIN_AND_CHLOROPHYLL_METABOLISM	23	0.318746	0.86901	0.655319	0.841113	0.595015	2025	tags=9%, list=7%, signal=8%	CP/BLVRB
KEGG_BUTANOATE_METABOLISM	KEGG_BUTANOATE_METABOLISM	KEGG_BUTANOATE_METABOLISM	33	-0.300086	-0.873746	0.656489	0.841113	0.595015	5050	tags=24%, list=17%, signal=20%	HMGCS1/BDH1/L2HGDH/ACSM2A/ACSM3/GAD1/GAD2
KEGG_GLUTATHIONE_METABOLISM	KEGG_GLUTATHIONE_METABOLISM	KEGG_GLUTATHIONE_METABOLISM	45	0.274621	0.864364	0.663697	0.841113	0.595015	4431	tags=22%, list=15%, signal=19%	GPX3/GGT5/GSTM5/LAP3/GPX2/MGST1/GGT1/MGST2/IDH1/GSTK1
KEGG_GLYCOSYLPHOSPHATIDYLINOSITOL_GPI_ANCHOR_BIOSYNTHESIS	KEGG_GLYCOSYLPHOSPHATIDYLINOSITOL_GPI_ANCHOR_BIOSYNTHESIS	KEGG_GLYCOSYLPHOSPHATIDYLINOSITOL_GPI_ANCHOR_BIOSYNTHESIS	24	-0.32152	-0.880989	0.664751	0.841113	0.595015	13130	tags=75%, list=45%, signal=41%	PIGA/PIGK/PIGT/PIGH/PIGM/PIGN/PIGF/PIGO/PIGX/PIGZ/PIGQ/PIGU/GPAA1/PIGC/GPLD1/PIGW/PGAP1
KEGG_OLFACTORY_TRANSDUCTION	KEGG_OLFACTORY_TRANSDUCTION	KEGG_OLFACTORY_TRANSDUCTION	42	0.27938	0.867451	0.674888	0.84817	0.600007	5152	tags=29%, list=18%, signal=24%	CNGA3/OR52N4/OR2W3/ARRB2/OR13J1/CNGA4/OR5K2/GUCA1B/PDE1C/ADRBK2/PRKG1/OR13A1
KEGG_SULFUR_METABOLISM	KEGG_SULFUR_METABOLISM	KEGG_SULFUR_METABOLISM	12	0.349553	0.8175	0.690171	0.861556	0.609476	5211	tags=42%, list=18%, signal=34%	SULT1A2/SULT1A1/CHST13/PAPSS2/CHST12
KEGG_PROTEIN_EXPORT	KEGG_PROTEIN_EXPORT	KEGG_PROTEIN_EXPORT	24	-0.312071	-0.855098	0.703065	0.867451	0.613647	13609	tags=71%, list=47%, signal=38%	SPCS2/SRP68/SRPR/SRP54/SRP19/IMMP1L/SEC61B/HSPA5/SPCS3/SRP72/SEC61A1/SRP9/SRPRB/SEC61G/SEC61A2/SRP9P1
KEGG_LIMONENE_AND_PINENE_DEGRADATION	KEGG_LIMONENE_AND_PINENE_DEGRADATION	KEGG_LIMONENE_AND_PINENE_DEGRADATION	10	0.365687	0.820742	0.706638	0.867451	0.613647	6295	tags=40%, list=22%, signal=31%	ALDH2/ALDH3A2/ALDH1B1/ALDH9A1
KEGG_DRUG_METABOLISM_OTHER_ENZYMES	KEGG_DRUG_METABOLISM_OTHER_ENZYMES	KEGG_DRUG_METABOLISM_OTHER_ENZYMES	32	-0.290266	-0.842067	0.708885	0.867451	0.613647	4947	tags=28%, list=17%, signal=23%	CYP3A4/UPP2/UPP1/UCK2/IMPDH2/CYP3A7/CYP2A6/XDH
KEGG_GLYCOSPHINGOLIPID_BIOSYNTHESIS_LACTO_AND_NEOLACTO_SERIES	KEGG_GLYCOSPHINGOLIPID_BIOSYNTHESIS_LACTO_AND_NEOLACTO_SERIES	KEGG_GLYCOSPHINGOLIPID_BIOSYNTHESIS_LACTO_AND_NEOLACTO_SERIES	24	-0.302312	-0.828358	0.735632	0.894298	0.632639	8455	tags=38%, list=29%, signal=27%	B3GALT5/B3GNT2/B4GALT2/GCNT2/B3GNT5/FUT3/B3GNT3/B3GNT4
KEGG_SMALL_CELL_LUNG_CANCER	KEGG_SMALL_CELL_LUNG_CANCER	KEGG_SMALL_CELL_LUNG_CANCER	84	0.237611	0.846154	0.78913	0.948649	0.671087	3759	tags=15%, list=13%, signal=14%	TRAF1/BIRC3/RXRG/PIK3CG/LAMA2/PIK3R5/COL4A4/LAMC2/CDK4/RB1/NFKBIA/ITGA6/LAMA4
KEGG_ARGININE_AND_PROLINE_METABOLISM	KEGG_ARGININE_AND_PROLINE_METABOLISM	KEGG_ARGININE_AND_PROLINE_METABOLISM	50	0.249005	0.799641	0.790541	0.948649	0.671087	4203	tags=26%, list=15%, signal=22%	GATM/CKMT2/LAP3/MAOA/DAO/ALDH2/GLUL/MAOB/CKM/ALDH3A2/GLUD2/SAT1/NOS3
KEGG_GALACTOSE_METABOLISM	KEGG_GALACTOSE_METABOLISM	KEGG_GALACTOSE_METABOLISM	23	-0.271225	-0.741121	0.81203	0.95544	0.675891	5827	tags=26%, list=20%, signal=21%	B4GALT2/PGM2/GALE/GCK/HK2
KEGG_STARCH_AND_SUCROSE_METABOLISM	KEGG_STARCH_AND_SUCROSE_METABOLISM	KEGG_STARCH_AND_SUCROSE_METABOLISM	28	-0.271851	-0.770535	0.822222	0.95544	0.675891	3135	tags=18%, list=11%, signal=16%	GCK/PGM2L1/ENPP1/HK2
KEGG_ALANINE_ASPARTATE_AND_GLUTAMATE_METABOLISM	KEGG_ALANINE_ASPARTATE_AND_GLUTAMATE_METABOLISM	KEGG_ALANINE_ASPARTATE_AND_GLUTAMATE_METABOLISM	31	-0.264806	-0.760964	0.824859	0.95544	0.675891	5280	tags=32%, list=18%, signal=26%	AGXT/GPT/ADSS/GLS2/CAD/GPT2/PPAT/GAD1/GAD2
KEGG_BETA_ALANINE_METABOLISM	KEGG_BETA_ALANINE_METABOLISM	KEGG_BETA_ALANINE_METABOLISM	22	-0.270898	-0.730894	0.828302	0.95544	0.675891	2346	tags=14%, list=8%, signal=13%	GAD1/GAD2
KEGG_ONE_CARBON_POOL_BY_FOLATE	KEGG_ONE_CARBON_POOL_BY_FOLATE	KEGG_ONE_CARBON_POOL_BY_FOLATE	17	-0.292653	-0.738612	0.833955	0.95544	0.675891	6733	tags=35%, list=23%, signal=27%	DHFR/GART/TYMS/SHMT2/FTCD
KEGG_THYROID_CANCER	KEGG_THYROID_CANCER	KEGG_THYROID_CANCER	29	-0.267243	-0.754697	0.834586	0.95544	0.675891	8108	tags=31%, list=28%, signal=22%	CCDC6/MYC/NRAS/CTNNB1/HRAS/LEF1/NTRK1/CDH1
KEGG_GLYCOSPHINGOLIPID_BIOSYNTHESIS_GANGLIO_SERIES	KEGG_GLYCOSPHINGOLIPID_BIOSYNTHESIS_GANGLIO_SERIES	KEGG_GLYCOSPHINGOLIPID_BIOSYNTHESIS_GANGLIO_SERIES	15	0.291406	0.719194	0.836864	0.95544	0.675891	3549	tags=20%, list=12%, signal=18%	B3GALT4/ST3GAL5/ST6GALNAC6
KEGG_ENDOMETRIAL_CANCER	KEGG_ENDOMETRIAL_CANCER	KEGG_ENDOMETRIAL_CANCER	52	-0.24235	-0.784742	0.837294	0.95544	0.675891	6351	tags=19%, list=22%, signal=15%	CTNNA2/ELK1/NRAS/CTNNB1/PIK3R2/HRAS/LEF1/CTNNA3/CDH1
KEGG_GAP_JUNCTION	KEGG_GAP_JUNCTION	KEGG_GAP_JUNCTION	82	-0.221261	-0.774667	0.893855	1	0.707414	5389	tags=18%, list=19%, signal=15%	TUBB/TUBB2A/PDGFC/CDK1/PRKCA/DRD2/PRKCG/TUBB2B/TUBA1C/GJA1/DRD1/TUBA3D/ADCY8/TUBA3E
KEGG_UBIQUITIN_MEDIATED_PROTEOLYSIS	KEGG_UBIQUITIN_MEDIATED_PROTEOLYSIS	KEGG_UBIQUITIN_MEDIATED_PROTEOLYSIS	133	-0.211078	-0.796582	0.912029	1	0.707414	13565	tags=50%, list=47%, signal=27%	UBE2R2/CUL5/TRIM32/MGRN1/CUL4B/UBA2/TCEB1/SAE1/PIAS4/ANAPC11/TRIM37/RFWD2/MID1/ANAPC7/HERC4/ANAPC4/UBE2E3/XIAP/UBA1/UBE2K/UBE2I/CBL/CUL3/DDB1/UBE2N/CDC27/ANAPC1/NEDD4/UBE2M/PIAS2/CDC16/HERC2/BRCA1/ERCC8/VHL/FBXW8/CDC23/CUL4A/PRPF19/KLHL9/UBE4B/UBR5/NHLRC1/UBE2E1/CUL2/UBE4A/UBE2O/UBE3A/UBE2QL1/TCEB2/ANAPC5/UBA6/FANCL/SKP2/CBLC/PIAS3/CUL7/KLHL13/UBE2C/UBE2U/UBE2S/AIRE/NEDD4L/CDC20/FBXO2
KEGG_INOSITOL_PHOSPHATE_METABOLISM	KEGG_INOSITOL_PHOSPHATE_METABOLISM	KEGG_INOSITOL_PHOSPHATE_METABOLISM	53	0.220499	0.720607	0.912664	1	0.707414	4812	tags=19%, list=17%, signal=16%	PIK3CG/PLCG2/PLCB2/PIK3C2B/INPP5J/INPP4B/PLCB1/PLCB4/PIK3CD/PIP4K2C
KEGG_DORSO_VENTRAL_AXIS_FORMATION	KEGG_DORSO_VENTRAL_AXIS_FORMATION	KEGG_DORSO_VENTRAL_AXIS_FORMATION	24	-0.231526	-0.634399	0.927203	1	0.707414	5433	tags=17%, list=19%, signal=14%	FMN2/SPIRE2/PIWIL1
KEGG_RNA_POLYMERASE	KEGG_RNA_POLYMERASE	KEGG_RNA_POLYMERASE	29	-0.233309	-0.658868	0.934211	1	0.707414	13195	tags=72%, list=46%, signal=39%	POLR3G/POLR3F/POLR2J/POLR2L/POLR2G/POLR3D/POLR3C/POLR3K/POLR2I/POLR1B/POLR2B/POLR2D/ZNRD1/POLR2A/POLR1D/POLR1A/POLR1C/POLR1E/POLR2H/POLR3A
KEGG_GLYCOSAMINOGLYCAN_BIOSYNTHESIS_CHONDROITIN_SULFATE	KEGG_GLYCOSAMINOGLYCAN_BIOSYNTHESIS_CHONDROITIN_SULFATE	KEGG_GLYCOSAMINOGLYCAN_BIOSYNTHESIS_CHONDROITIN_SULFATE	22	-0.229151	-0.618259	0.935849	1	0.707414	8380	tags=41%, list=29%, signal=29%	CHPF/B3GALT6/CHST11/B3GAT2/XYLT1/B3GAT1/CHSY1/CHSY3
KEGG_PENTOSE_AND_GLUCURONATE_INTERCONVERSIONS	KEGG_PENTOSE_AND_GLUCURONATE_INTERCONVERSIONS	KEGG_PENTOSE_AND_GLUCURONATE_INTERCONVERSIONS	10	-0.24873	-0.55717	0.940187	1	0.707414	10740	tags=50%, list=37%, signal=31%	UGT2B7/DCXR/XYLB/DHDH
KEGG_ERBB_SIGNALING_PATHWAY	KEGG_ERBB_SIGNALING_PATHWAY	KEGG_ERBB_SIGNALING_PATHWAY	86	0.203638	0.730139	0.946809	1	0.707414	5477	tags=21%, list=19%, signal=17%	BTC/TGFA/AREG/PIK3CG/PLCG2/PIK3R5/PRKCB/HBEGF/ERBB3/STAT5A/EREG/CBLB/STAT5B/PIK3CD/MAPK3/NCK1/GRB2/EGFR
KEGG_RENAL_CELL_CARCINOMA	KEGG_RENAL_CELL_CARCINOMA	KEGG_RENAL_CELL_CARCINOMA	69	0.206973	0.712299	0.948276	1	0.707414	1503	tags=6%, list=5%, signal=6%	FIGF/TGFA/PIK3CG/PIK3R5
KEGG_NOTCH_SIGNALING_PATHWAY	KEGG_NOTCH_SIGNALING_PATHWAY	KEGG_NOTCH_SIGNALING_PATHWAY	47	0.21997	0.694105	0.951945	1	0.707414	4009	tags=13%, list=14%, signal=11%	MFNG/PTCRA/DLL4/HES5/NOTCH4/DTX1
KEGG_PROSTATE_CANCER	KEGG_PROSTATE_CANCER	KEGG_PROSTATE_CANCER	87	-0.207942	-0.730861	0.952652	1	0.707414	7780	tags=26%, list=27%, signal=19%	HSP90AA1/NKX3-1/HSP90AB1/BCL2/CDK2/E2F1/NRAS/CTNNB1/PIK3R2/HRAS/E2F3/CREB3L4/PDGFC/AR/CCNE1/E2F2/CCNE2/LEF1/IGF1R/INSRR/SRD5A2/FGFR2
KEGG_CIRCADIAN_RHYTHM_MAMMAL	KEGG_CIRCADIAN_RHYTHM_MAMMAL	KEGG_CIRCADIAN_RHYTHM_MAMMAL	13	0.230134	0.545182	0.961207	1	0.707414	22306	tags=100%, list=77%, signal=23%	CRY2/NR1D1/PER3/PER1/PER2/CSNK1D/ARNTL/BHLHE40/CSNK1E/CLOCK/BHLHE41/CRY1/NPAS2
KEGG_NEUROTROPHIN_SIGNALING_PATHWAY	KEGG_NEUROTROPHIN_SIGNALING_PATHWAY	KEGG_NEUROTROPHIN_SIGNALING_PATHWAY	123	0.196592	0.741845	0.968958	1	0.707414	6194	tags=22%, list=21%, signal=17%	FASLG/PIK3CG/PLCG2/ARHGDIB/NGF/PIK3R5/RPS6KA1/MAP3K5/NGFR/NFKBIA/MAP3K1/FRS2/PRKCD/IRAK3/RAP1A/RAP1B/PIK3CD/MAPK3/NFKB1/GRB2/IKBKB/YWHAH/MAPK10/CSK/SH2B3/MAP3K3/RPS6KA2
KEGG_FRUCTOSE_AND_MANNOSE_METABOLISM	KEGG_FRUCTOSE_AND_MANNOSE_METABOLISM	KEGG_FRUCTOSE_AND_MANNOSE_METABOLISM	34	-0.204811	-0.599621	0.969868	1	0.707414	6665	tags=21%, list=23%, signal=16%	ALDOB/TPI1/AKR1B10/GMDS/HK2/PFKFB4
KEGG_SNARE_INTERACTIONS_IN_VESICULAR_TRANSPORT	KEGG_SNARE_INTERACTIONS_IN_VESICULAR_TRANSPORT	KEGG_SNARE_INTERACTIONS_IN_VESICULAR_TRANSPORT	38	0.204272	0.62275	0.973451	1	0.707414	4071	tags=13%, list=14%, signal=11%	VAMP8/STX11/VAMP5/STX12/STX7
KEGG_COLORECTAL_CANCER	KEGG_COLORECTAL_CANCER	KEGG_COLORECTAL_CANCER	62	-0.184561	-0.61793	0.974406	1	0.707414	8900	tags=27%, list=31%, signal=19%	GSK3B/MAPK8/TGFB1/APC2/MSH3/BCL2/MYC/CTNNB1/JUN/PIK3R2/TGFB2/MSH6/MSH2/BIRC5/LEF1/RAC3
KEGG_PENTOSE_PHOSPHATE_PATHWAY	KEGG_PENTOSE_PHOSPHATE_PATHWAY	KEGG_PENTOSE_PHOSPHATE_PATHWAY	25	-0.20761	-0.571558	0.979048	1	0.707414	11923	tags=48%, list=41%, signal=28%	PGM1/GPI/TALDO1/PRPS1/ALDOA/PFKP/TKT/ALDOB/RPIA/TKTL1/PGM2
KEGG_GLYCOSAMINOGLYCAN_BIOSYNTHESIS_KERATAN_SULFATE	KEGG_GLYCOSAMINOGLYCAN_BIOSYNTHESIS_KERATAN_SULFATE	KEGG_GLYCOSAMINOGLYCAN_BIOSYNTHESIS_KERATAN_SULFATE	14	-0.207938	-0.49874	0.984991	1	0.707414	8662	tags=29%, list=30%, signal=20%	CHST6/B3GNT2/B4GALT2
KEGG_SELENOAMINO_ACID_METABOLISM	KEGG_SELENOAMINO_ACID_METABOLISM	KEGG_SELENOAMINO_ACID_METABOLISM	26	-0.178101	-0.494107	0.994307	1	0.707414	11437	tags=50%, list=39%, signal=30%	METTL6/MAT2A/MARS/GGT6/LCMT1/MARS2/PAPSS1/SEPHS1/AHCY/CBS/SCLY/CTH
KEGG_N_GLYCAN_BIOSYNTHESIS	KEGG_N_GLYCAN_BIOSYNTHESIS	KEGG_N_GLYCAN_BIOSYNTHESIS	46	-0.159722	-0.5064	0.994604	1	0.707414	13968	tags=57%, list=48%, signal=29%	DOLPP1/DPAGT1/MGAT4B/MAN2A1/DAD1/MAN1A2/MAN1B1/MOGS/B4GALT3/ALG6/GANAB/STT3B/RPN1/RFT1/DDOST/FUT8/MGAT5/ALG11/STT3A/ALG3/ALG10/B4GALT2/ALG10B/TUSC3/MGAT5B
KEGG_ALZHEIMERS_DISEASE	KEGG_ALZHEIMERS_DISEASE	KEGG_ALZHEIMERS_DISEASE	151	-0.161253	-0.619241	1	1	0.707414	1128	tags=3%, list=4%, signal=3%	CDK5R1/NDUFA4L2/GRIN1/NOS1
KEGG_HUNTINGTONS_DISEASE	KEGG_HUNTINGTONS_DISEASE	KEGG_HUNTINGTONS_DISEASE	167	-0.127521	-0.495926	1	1	0.707414	14615	tags=52%, list=50%, signal=26%	NRF1/TAF4/SIN3A/ATP5G2/ATP5J/NDUFB6/HDAC2/AP2A1/CASP9/APAF1/COX7A2L/CYCS/NDUFB8/TBP/COX6A1/CYC1/COX6C/COX5A/UQCRB/NDUFA3/SLC25A5/EP300/NDUFB9/NDUFS3/POLR2J/ATP5O/CLTA/POLR2L/UQCRFS1/NDUFV2/HAP1/POLR2G/CREBBP/ITPR1/COX5B/NDUFB4/ATP5E/NDUFS2/HTT/NDUFV1/NDUFC2/AP2B1/NDUFAB1/ATP5B/NDUFB10/NDUFA10/BDNF/VDAC2/REST/TGM2/COX8C/PLCB3/POLR2I/ATP5G1/CREB3L2/COX6B1/ATP5C1/POLR2B/POLR2D/UQCRC1/VDAC1/UQCRHL/ND…
KEGG_PARKINSONS_DISEASE	KEGG_PARKINSONS_DISEASE	KEGG_PARKINSONS_DISEASE	111	-0.13656	-0.503338	1	1	0.707414	1595	tags=50%, list=6%, signal=47%	ATP5G2/ATP5J/GPR37/NDUFB6/CASP9/APAF1/COX7A2L/CYCS/NDUFB8/COX6A1/CYC1/COX6C/COX5A/UQCRB/NDUFA3/SLC25A5/NDUFB9/NDUFS3/ATP5O/UQCRFS1/NDUFV2/COX5B/NDUFB4/ATP5E/NDUFS2/NDUFV1/NDUFC2/UBA1/NDUFAB1/ATP5B/NDUFB10/NDUFA10/VDAC2/COX8C/ATP5G1/COX6B1/ATP5C1/UQCRC1/VDAC1/UQCRHL/NDUFA7/ATP5D/NDUFS8/NDUFS6/TH/UQCRH/SEPT5/NDUFS5/COX6A2/UCHL1/SNCAIP/COX6B2/NDUFA4L2/SLC6A3
