# Supplementary material for: Retinoic Acid Metabolism-Related Enzyme Signature Identified Prognostic and Immune Characteristics in Sarcoma
Source: Front Cell Dev Biol. 2022 Feb 3;9:780951. doi: 10.3389/fcell.2021.780951 (PMC8852678; doi:10.3389/fcell.2021.780951)
Supplement: Supplementary file 13 [file Table1.xlsx]

## Sheet: Sheet1
Table S1. Evaluation of metrics performance among different numbers of subgroups.
Numbers	Overall Survival				Average Silhouette index index	Calinski–Harabasz criterion
	c-index	95%CI	upper 95%CI	lower 95%CI
2	0.709	0.02	0.729	0.689	0.643	1195.74
3	0.644	0.029	0.673	0.615	0.604	1185.17
4	0.632	0.027	0.659	0.605	0.496	988.925
5	0.636	0.027	0.663	0.609	0.523	917.348
6	0.621	0.028	0.649	0.593	0.571	655.004
